# Supplementary material for: Tetravalent cerium pseudohalide complexes supported by the Kläui tripodal ligand [Co(η5-C5H5){P(O)(OEt)2}3]−
Source: Royal Society of Chemistry journal article supplement (doi:10.1039/c6dt03740b), 2016-01-01
Supplement: c6dt03740b1.pdf [file c6dt03740b1.pdf]

## Electronic Supplementary Information

### Tetravalent Cerium Pseudohalide Complexes Supported by the Kläui Tripodal Ligand $[\text{Co}(\eta^5\text{-C}_5\text{H}_5)\{\text{P}(\text{O})(\text{OEt})_2\}_3]^-$

*Ka-Chun Au-Yeung, Yat-Ming So\*, Herman H.-Y. Sung, Ian D. Williams and Wa-Hung*

*Leung\**

#### Contents

1. Crystallographic data and experimental details for complexes **2**, **3**, **6** and **9**
2. Preliminary X-ray structure of **5**
3. Preliminary X-ray structure of **8**
4. XPS spectrum of **9**
5. NMR spectra of **2-4** and **6-9**
6. IR spectra of **2-9**
7. Electronic absorption spectra of **1-4**
8. Cyclic voltammograms of complexes **2** and **3**.

**Table S1.** Crystallographic data and experimental details for complexes **2**, **3**, **6** and **9**

|                                                                                                        | <b>2</b> ·3CH <sub>2</sub> Cl <sub>2</sub>                                                                                     | <b>3</b>                                                                                        | <b>6</b> ·½C <sub>4</sub> H <sub>10</sub> O                                                                       | <b>9</b> ·C <sub>6</sub> H <sub>14</sub>                                                                         |
|--------------------------------------------------------------------------------------------------------|--------------------------------------------------------------------------------------------------------------------------------|-------------------------------------------------------------------------------------------------|-------------------------------------------------------------------------------------------------------------------|------------------------------------------------------------------------------------------------------------------|
| Formula                                                                                                | C <sub>39</sub> H <sub>76</sub> CeCo <sub>2</sub> N <sub>2</sub> O <sub>18</sub> P <sub>6</sub> S <sub>2</sub> Cl <sub>6</sub> | C <sub>34</sub> H <sub>70</sub> CeCo <sub>2</sub> N <sub>6</sub> O <sub>18</sub> P <sub>6</sub> | C <sub>74</sub> H <sub>105</sub> B <sub>2</sub> CeCo <sub>2</sub> N <sub>2</sub> O <sub>18.5</sub> P <sub>6</sub> | C <sub>72</sub> H <sub>147</sub> Ce <sub>4</sub> Co <sub>4</sub> N <sub>18</sub> O <sub>39</sub> P <sub>12</sub> |
| <i>F</i> <sub>w</sub>                                                                                  | 1580.63                                                                                                                        | 1294.76                                                                                         | 1784.02                                                                                                           | 3044.9                                                                                                           |
| Crystal system                                                                                         | Orthorhombic                                                                                                                   | Monoclinic                                                                                      | Orthorhombic                                                                                                      | Orthorhombic                                                                                                     |
| Space group                                                                                            | Pnma                                                                                                                           | P2 <sub>1</sub> /n                                                                              | Pna2 <sub>1</sub> /n                                                                                              | Pbcn                                                                                                             |
| <i>a</i> (Å)                                                                                           | 24.4099(3)                                                                                                                     | 11.57(13)                                                                                       | 53.8313(8)                                                                                                        | 23.9797(3)                                                                                                       |
| <i>b</i> (Å)                                                                                           | 19.0973(18)                                                                                                                    | 23.4809(3)                                                                                      | 13.7543(14)                                                                                                       | 20.7737(2)                                                                                                       |
| <i>c</i> (Å)                                                                                           | 13.8324(15)                                                                                                                    | 19.3336(2)                                                                                      | 22.3077(2)                                                                                                        | 24.0697(3)                                                                                                       |
| <i>α</i> , (°)                                                                                         | 90                                                                                                                             | 90                                                                                              | 90                                                                                                                | 90                                                                                                               |
| <i>β</i> , (°)                                                                                         | 90                                                                                                                             | 90.8133(12)                                                                                     | 90                                                                                                                | 90                                                                                                               |
| <i>γ</i> , (°)                                                                                         | 90                                                                                                                             | 90                                                                                              | 90                                                                                                                | 90                                                                                                               |
| <i>V</i> (Å <sup>3</sup> )                                                                             | 6448.18(12)                                                                                                                    | 5251.91(10)                                                                                     | 16516.9(3)                                                                                                        | 11990.2(2)                                                                                                       |
| <i>Z</i>                                                                                               | 4                                                                                                                              | 4                                                                                               | 8                                                                                                                 | 4                                                                                                                |
| <i>ρ</i> <sub>calcd</sub> (g cm <sup>-3</sup> )                                                        | 1.628                                                                                                                          | 1.638                                                                                           | 1.435                                                                                                             | 1.687                                                                                                            |
| <i>T</i> (K)                                                                                           | 99.9(5)                                                                                                                        | 100                                                                                             | 99.9(5)                                                                                                           | 99.9(5)                                                                                                          |
| <i>F</i> (000)                                                                                         | 3212                                                                                                                           | 2648                                                                                            | 7384                                                                                                              | 6124.0                                                                                                           |
| <i>μ</i> (mm <sup>-1</sup> )                                                                           | 14.177                                                                                                                         | 13.815                                                                                          | 8.939                                                                                                             | 2.265                                                                                                            |
| No. of reflns                                                                                          | 34924                                                                                                                          | 23456                                                                                           | 91912                                                                                                             | 67634                                                                                                            |
| No. of indep reflns                                                                                    | 5878                                                                                                                           | 9243                                                                                            | 26902                                                                                                             | 11701                                                                                                            |
| <i>R</i> <sub>int</sub>                                                                                | 0.1552                                                                                                                         | 0.0605                                                                                          | 0.0896                                                                                                            | 0.0533                                                                                                           |
| GoF <sup>a</sup>                                                                                       | 1.001                                                                                                                          | 1.001                                                                                           | 1.001                                                                                                             | 1.003                                                                                                            |
| <i>R</i> <sub>1</sub> <sup>b</sup> , w <i>R</i> <sub>2</sub> <sup>c</sup> ( <i>I</i> > 2σ( <i>I</i> )) | 0.0543, 0.1181                                                                                                                 | 0.0606, 0.1476                                                                                  | 0.0576, 0.1204                                                                                                    | 0.0466, 0.1208                                                                                                   |
| <i>R</i> <sub>1</sub> , w <i>R</i> <sub>2</sub> (all data)                                             | 0.0816, 0.1288                                                                                                                 | 0.0826, 0.1596                                                                                  | 0.0827, 0.1304                                                                                                    | 0.0649, 0.1309                                                                                                   |

<sup>a</sup> GoF = [Σw(|*F*<sub>o</sub>| - |*F*<sub>c</sub>|)<sup>2</sup>/(*N*<sub>obs</sub> - *N*<sub>param</sub>)]<sup>1/2</sup>, <sup>b</sup> *R*<sub>1</sub> = Σ ||*F*<sub>o</sub>| - |*F*<sub>c</sub>|| / Σ |*F*<sub>o</sub>|, <sup>c</sup> w*R*<sub>2</sub> = [Σw(|*F*<sub>o</sub><sup>2</sup> - |*F*<sub>c</sub><sup>2</sup> |)<sup>2</sup>/Σw|*F*<sub>o</sub><sup>2</sup> |<sup>2</sup>]<sup>1/2</sup>.

**Figure S1.** Preliminary X-ray structure of **5** showing the repeating unit  $\{\text{Ce}^{\text{IV}}(\text{L}_{\text{OEt}})_2\} \{\mu\text{-Ag}(\text{CN})_2\}(\text{AgCl}_2)$ . The Ce atoms are linked together via the cyano groups of the  $[\text{Ag}(\text{CN})_2]^-$  unit. Hydrogen atoms of the  $\text{L}_{\text{OEt}}$  ligands are omitted for clarity. The ellipsoids are drawn at 30% probability level ( $R_1 = 6.33\%$ )

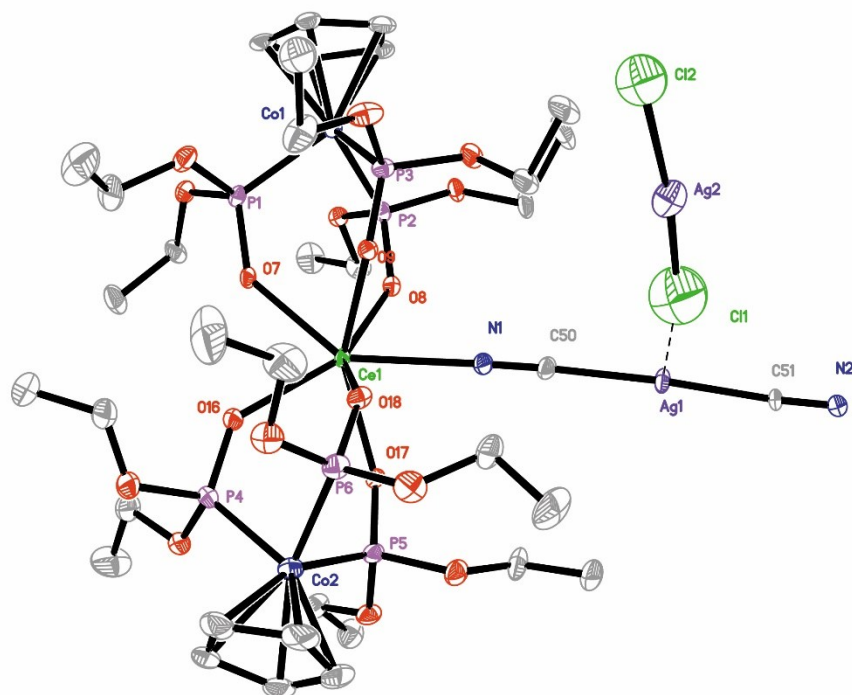

**Figure S2.** Preliminary X-ray structure of **8**. Hydrogen atoms of the  $\text{L}_{\text{OEt}^-}$  ligands are omitted for clarity. The ellipsoids are drawn at 30% probability level ( $R_1 = 6.35\%$ )

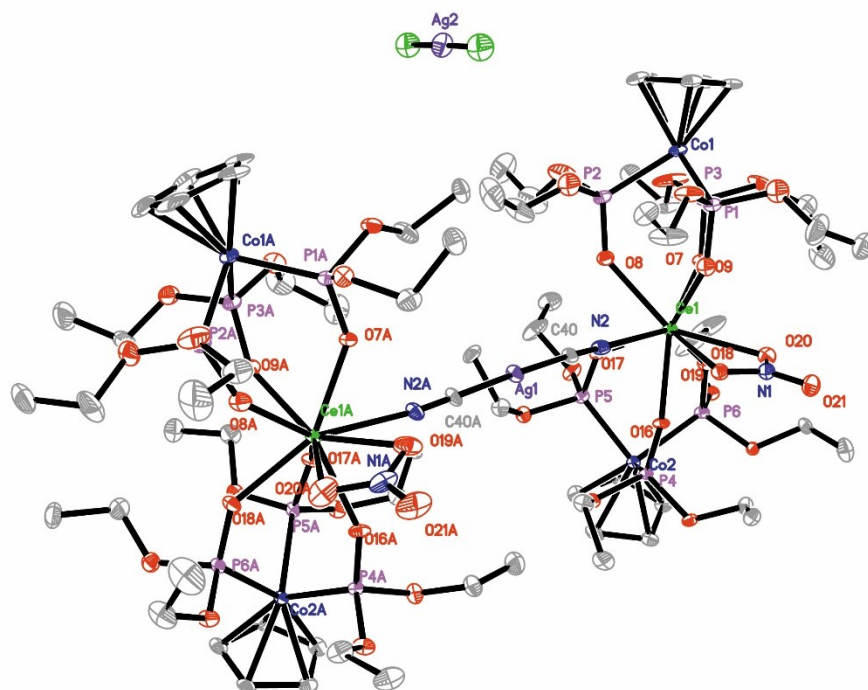

**Table S2.** Crystallographic data for the preliminary X-ray structures of **5** and **8**

|                                             | <b>5</b>                                                                                                                                         | <b>8</b>                                                                                                                                        |
|---------------------------------------------|--------------------------------------------------------------------------------------------------------------------------------------------------|-------------------------------------------------------------------------------------------------------------------------------------------------|
| Formula                                     | Ag <sub>4</sub> C <sub>78</sub> Ce <sub>2</sub> H <sub>152</sub> Cl <sub>16</sub> Co <sub>4</sub> N <sub>4</sub> O <sub>36</sub> P <sub>12</sub> | C <sub>70</sub> H <sub>140</sub> Ag <sub>2</sub> Ce <sub>2</sub> Cl <sub>2</sub> Co <sub>4</sub> N <sub>4</sub> O <sub>42</sub> P <sub>12</sub> |
| $F_w$                                       | 3608.31                                                                                                                                          | 2884.09                                                                                                                                         |
| Crystal system                              | Monoclinic                                                                                                                                       | Monoclinic                                                                                                                                      |
| Space group                                 | P2 <sub>1</sub> /c                                                                                                                               | P2 <sub>1</sub> /c                                                                                                                              |
| $a$ (Å)                                     | 13.2536(3)                                                                                                                                       | 11.66174(11)                                                                                                                                    |
| $b$ (Å)                                     | 19.2946(3)                                                                                                                                       | 39.9468(3)                                                                                                                                      |
| $c$ (Å)                                     | 26.5988(7)                                                                                                                                       | 23.73426(18)                                                                                                                                    |
| $\alpha$ , (°)                              | 90                                                                                                                                               | 90                                                                                                                                              |
| $\beta$ , (°)                               | 91.280(2)                                                                                                                                        | 96.7587(8)                                                                                                                                      |
| $\gamma$ , (°)                              | 90                                                                                                                                               | 90                                                                                                                                              |
| $V$ (Å <sup>3</sup> )                       | 6800.2(3)                                                                                                                                        | 10979.76(16)                                                                                                                                    |
| $Z$                                         | 2                                                                                                                                                | 4                                                                                                                                               |
| $\rho_{\text{calcd}}$ (g cm <sup>-3</sup> ) | 1.762                                                                                                                                            | 1.745                                                                                                                                           |
| $T$ (K)                                     | 293(2)                                                                                                                                           | 293(2)                                                                                                                                          |
| $F(000)$                                    | 3600.0                                                                                                                                           | 5824.0                                                                                                                                          |
| $\mu$ (mm <sup>-1</sup> )                   | 2.214                                                                                                                                            | 16.477                                                                                                                                          |
| No. of reflns                               | 42452                                                                                                                                            | 48430                                                                                                                                           |
| No. of indep reflns                         | 15918                                                                                                                                            | 21809                                                                                                                                           |
| $R_{\text{int}}$                            | 0.0439                                                                                                                                           | 0.0435                                                                                                                                          |
| GoF <sup>a</sup>                            | 1.056                                                                                                                                            | 1.020                                                                                                                                           |
| $R_1^b$ , $wR_2^c(I > 2\sigma(I))$          | 0.0633, 0.1543                                                                                                                                   | 0.0635, 0.1601                                                                                                                                  |
| $R_1$ , $wR_2$ (all data)                   | 0.0984, 0.1741                                                                                                                                   | 0.0850, 0.1771                                                                                                                                  |

C 1s peak is shifted to 285.0 eV for energy calibration.

wide2(AuYoungKaChun20160810\_AY3)  
XPS Spectrum Lens Mode Hybrid Res:160 Iris(Aper):10t(Slot)  
Acq. Time(s): 140 Sweeps: 1 Anode:Mono(Al (Mono))(150 W) Step(msV): 1000.0  
Dwell Time(ms): 100 Charge Neutraliser :On (Current 1.7 A, Balance 2.5 V, Bias 1.3 V) Acquired On :16/08/10 15:40:28

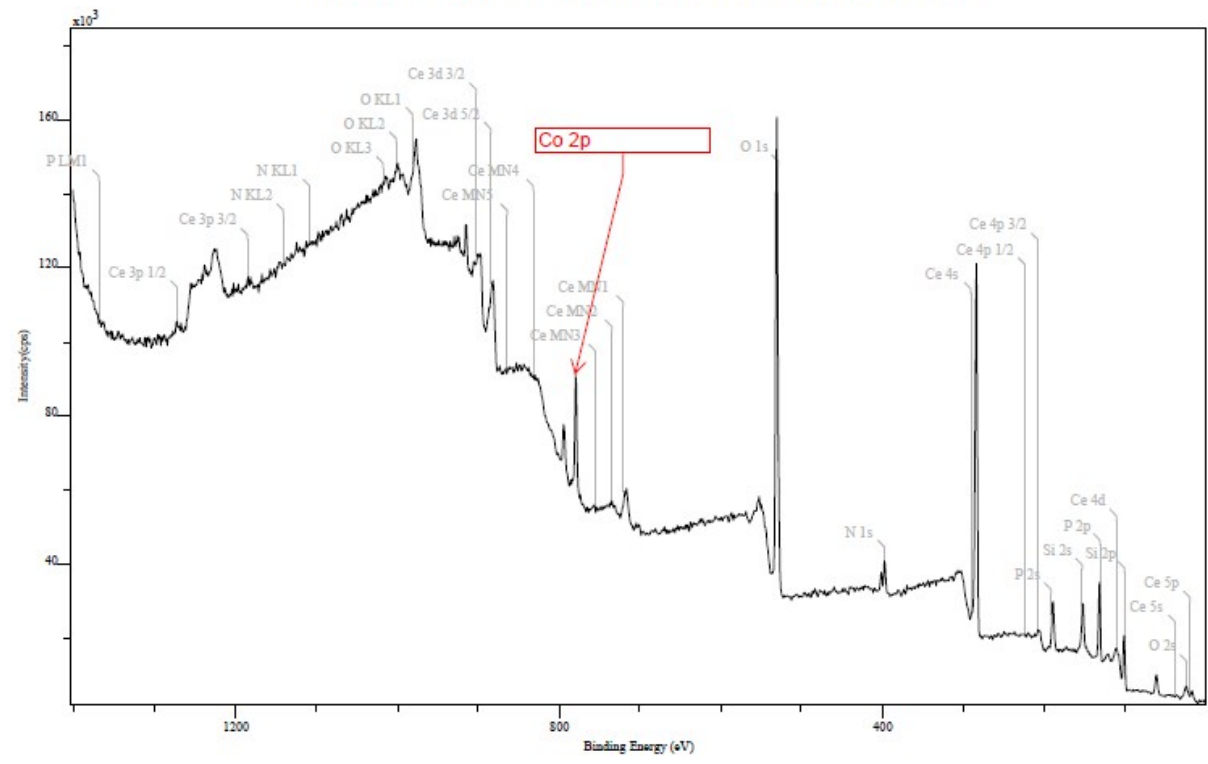

Figure S3. Full XPS spectrum of 9

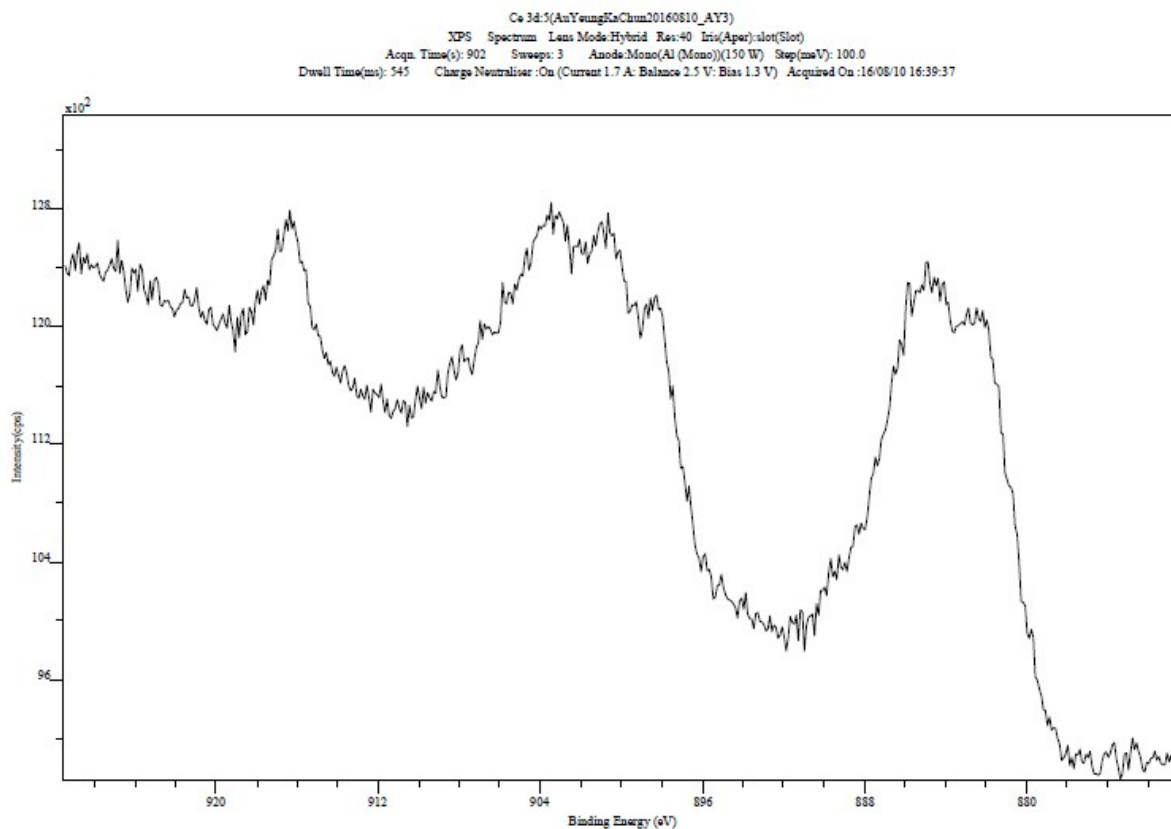

**Figure S4.** The Ce region of the XPS spectrum of **9**

The XPS spectrum was obtained on a Kratos Axis Ultra DLD instrument. The observed signal at ca. 916 eV is characteristic of Ce(IV) (cf. lit. 917 eV<sup>a</sup>). No signal at ca. 880 eV that is characteristic of Ce(III) was observed, thus indicating all the Ce centers in **9** are Ce<sup>4+</sup>.

<sup>a</sup>Beche *et al.*, *Surf. Interface Anal.* 2008, **40**, 264–267.

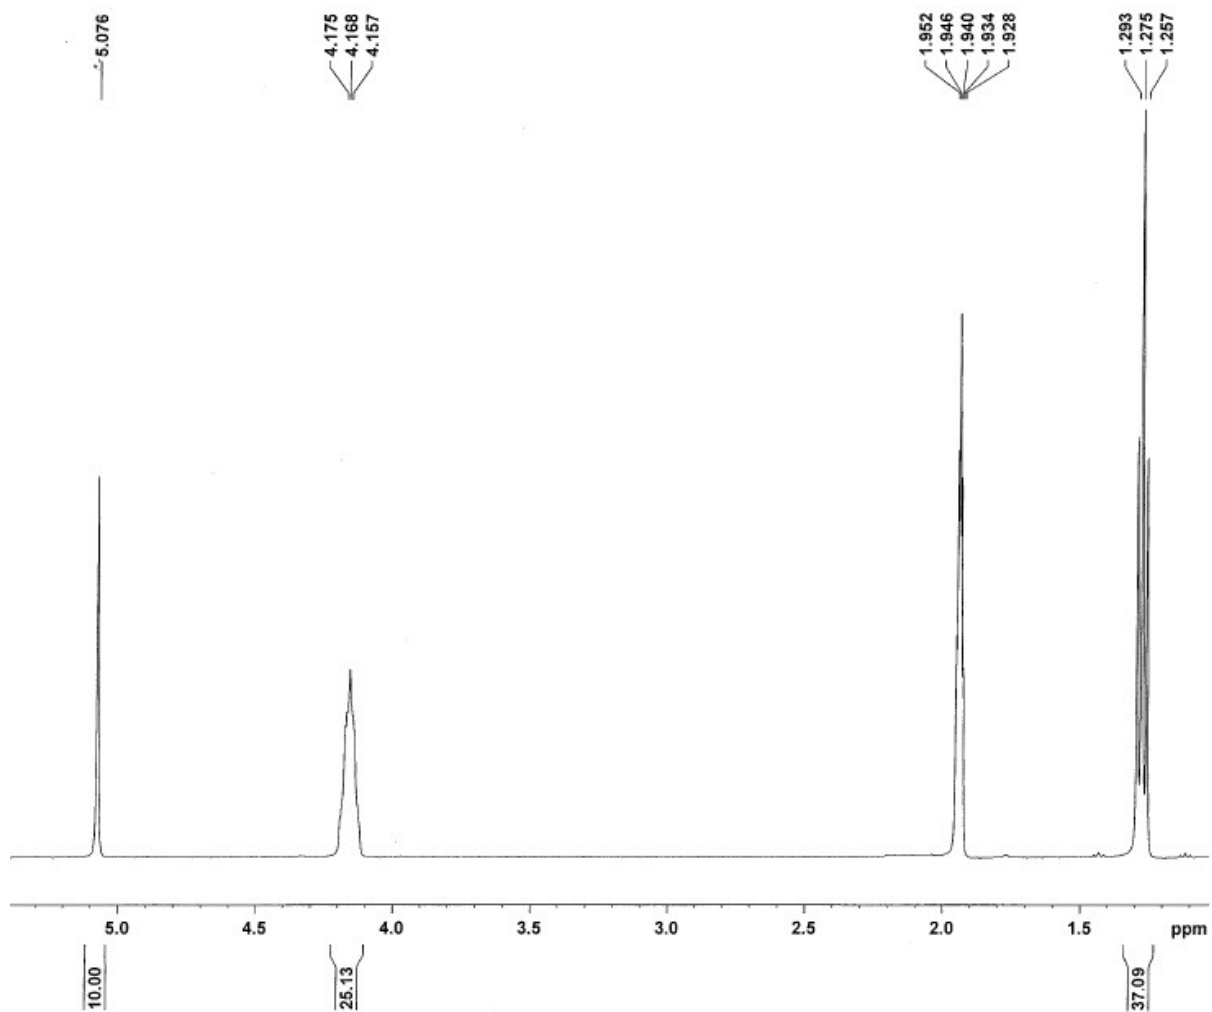

**Figure S5.** <sup>1</sup>H NMR spectrum (400 MHz, CD<sub>3</sub>CN, 298 K) of **2**.



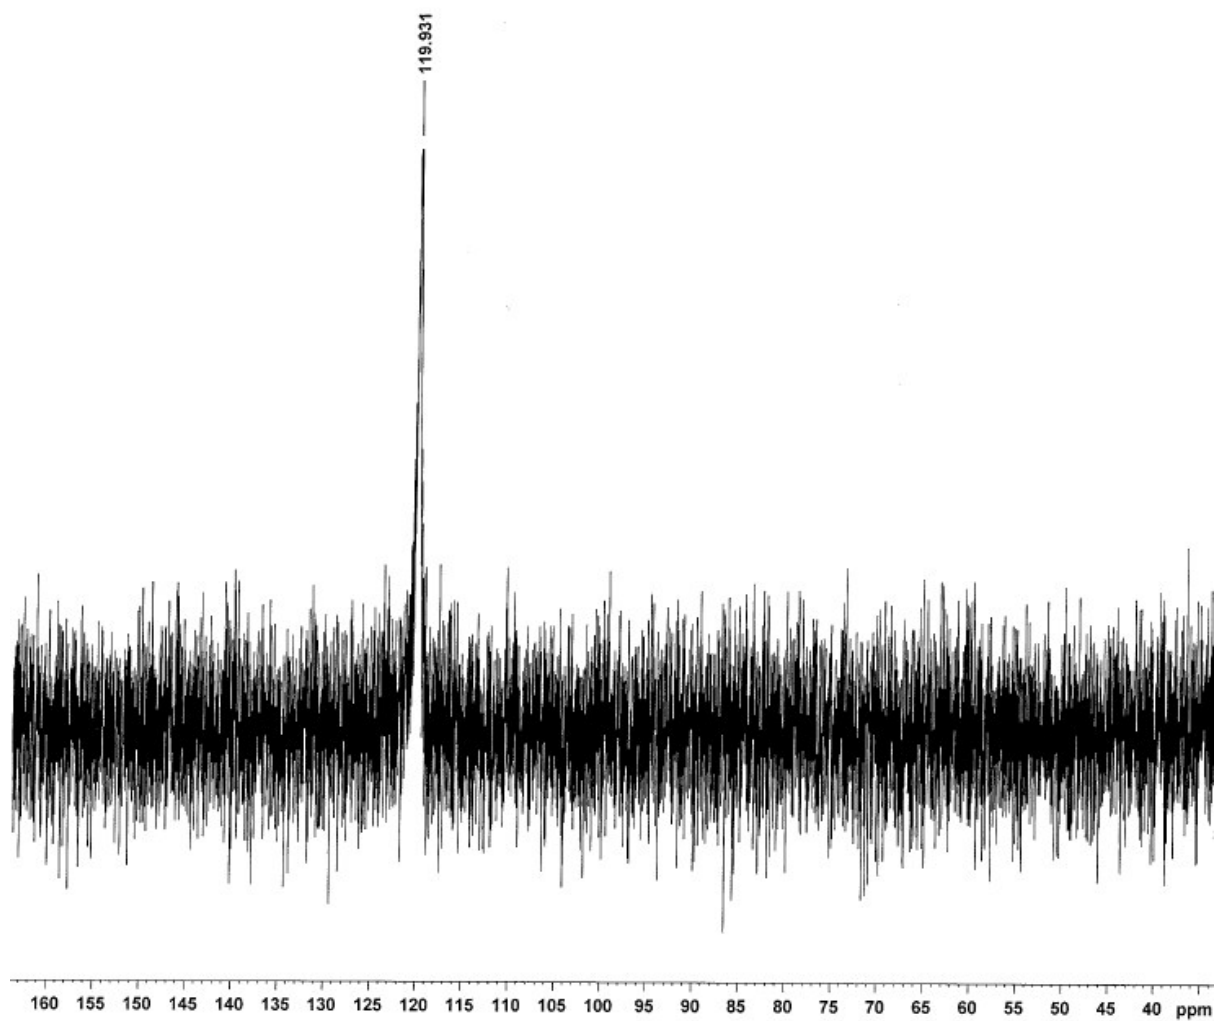

**Figure S6.**  $^{31}\text{P}$   $\{^1\text{H}\}$  NMR spectrum (160 MHz,  $\text{CD}_3\text{CN}$ , 298 K) of **2**.

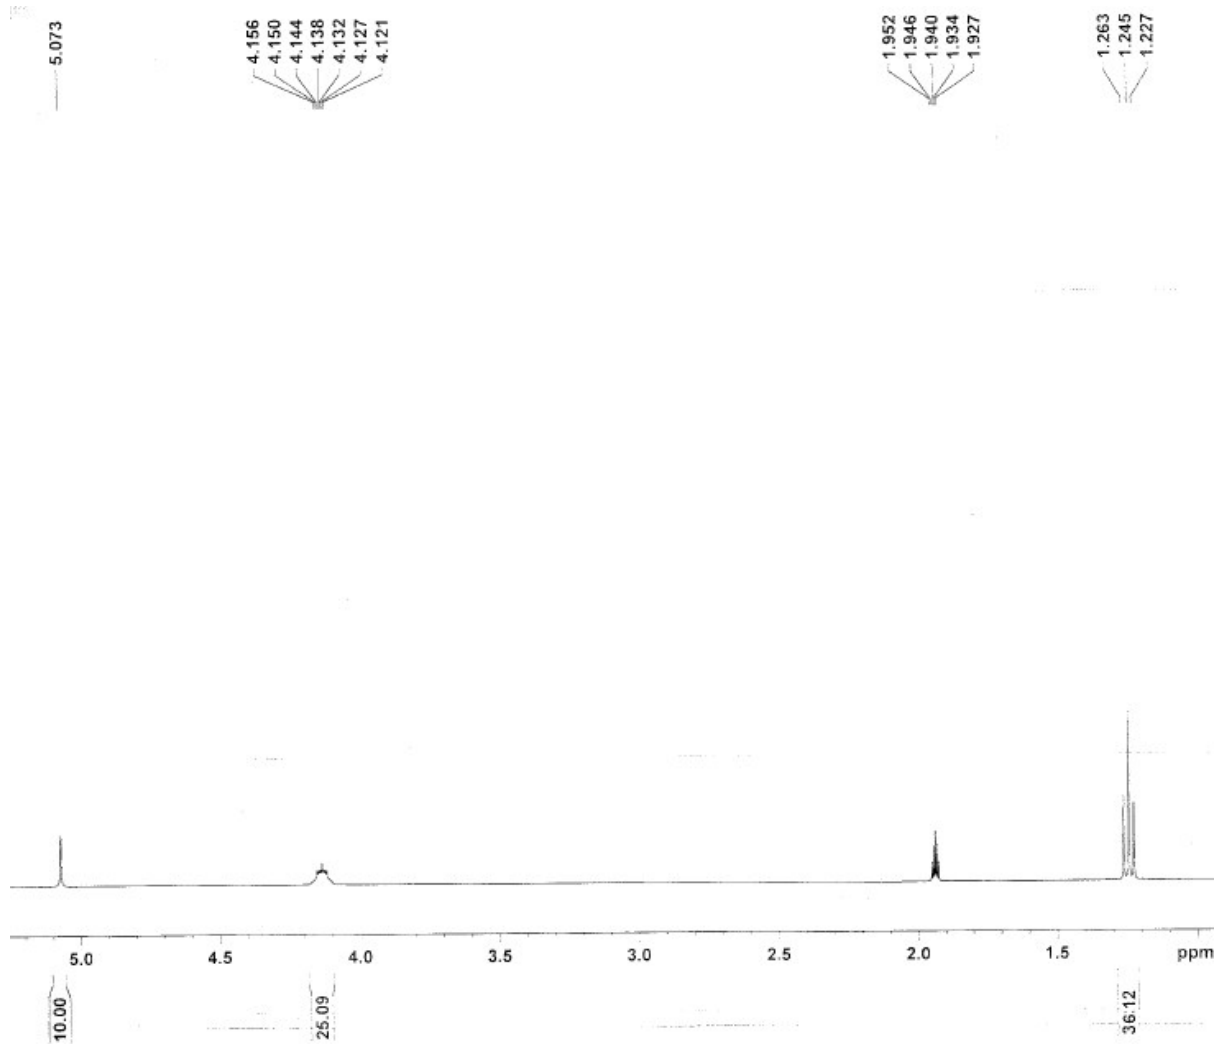

**Figure S7.** <sup>1</sup>H NMR spectrum (400 MHz, CD<sub>3</sub>CN, 298 K) of **3**.

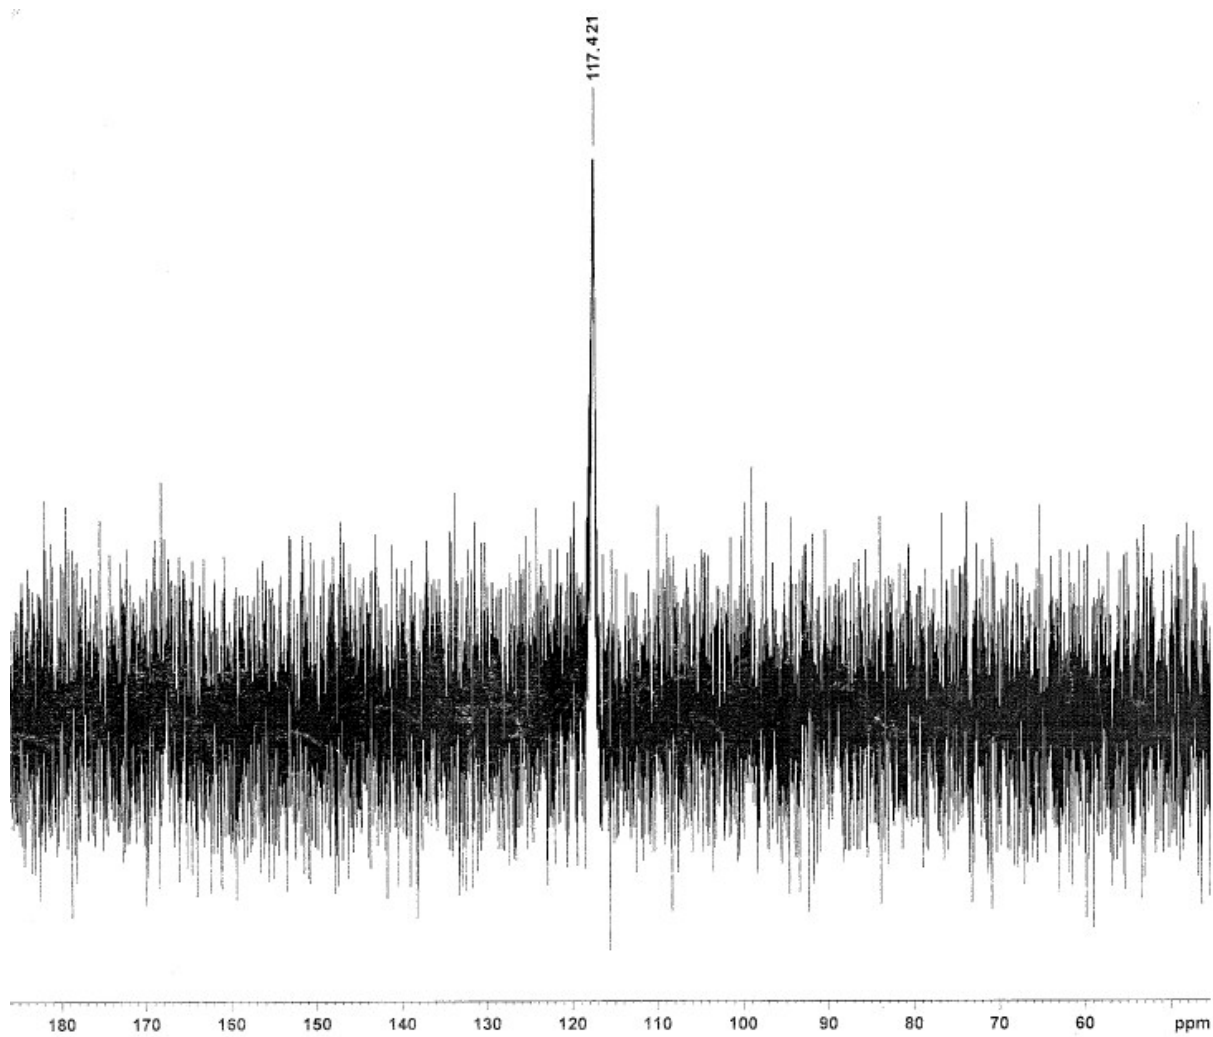

**Figure S8.**  $^{31}\text{P}$   $\{^1\text{H}\}$  NMR spectrum (160 MHz,  $\text{CD}_3\text{CN}$ , 298 K) of **3**.

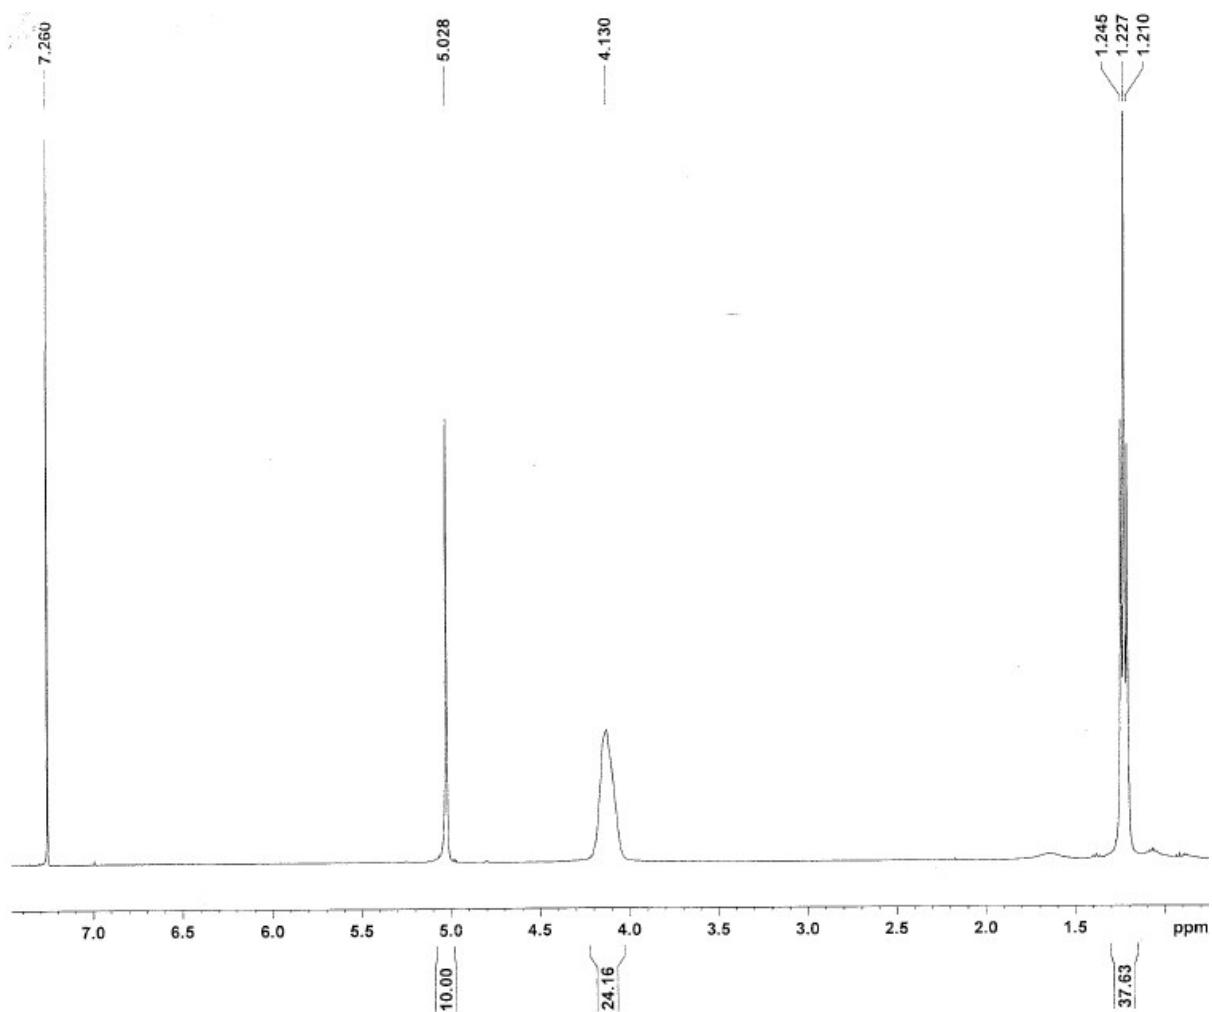

**Figure S9.** <sup>1</sup>H NMR spectrum (400 MHz, CDCl<sub>3</sub>, 298 K) of **4**.

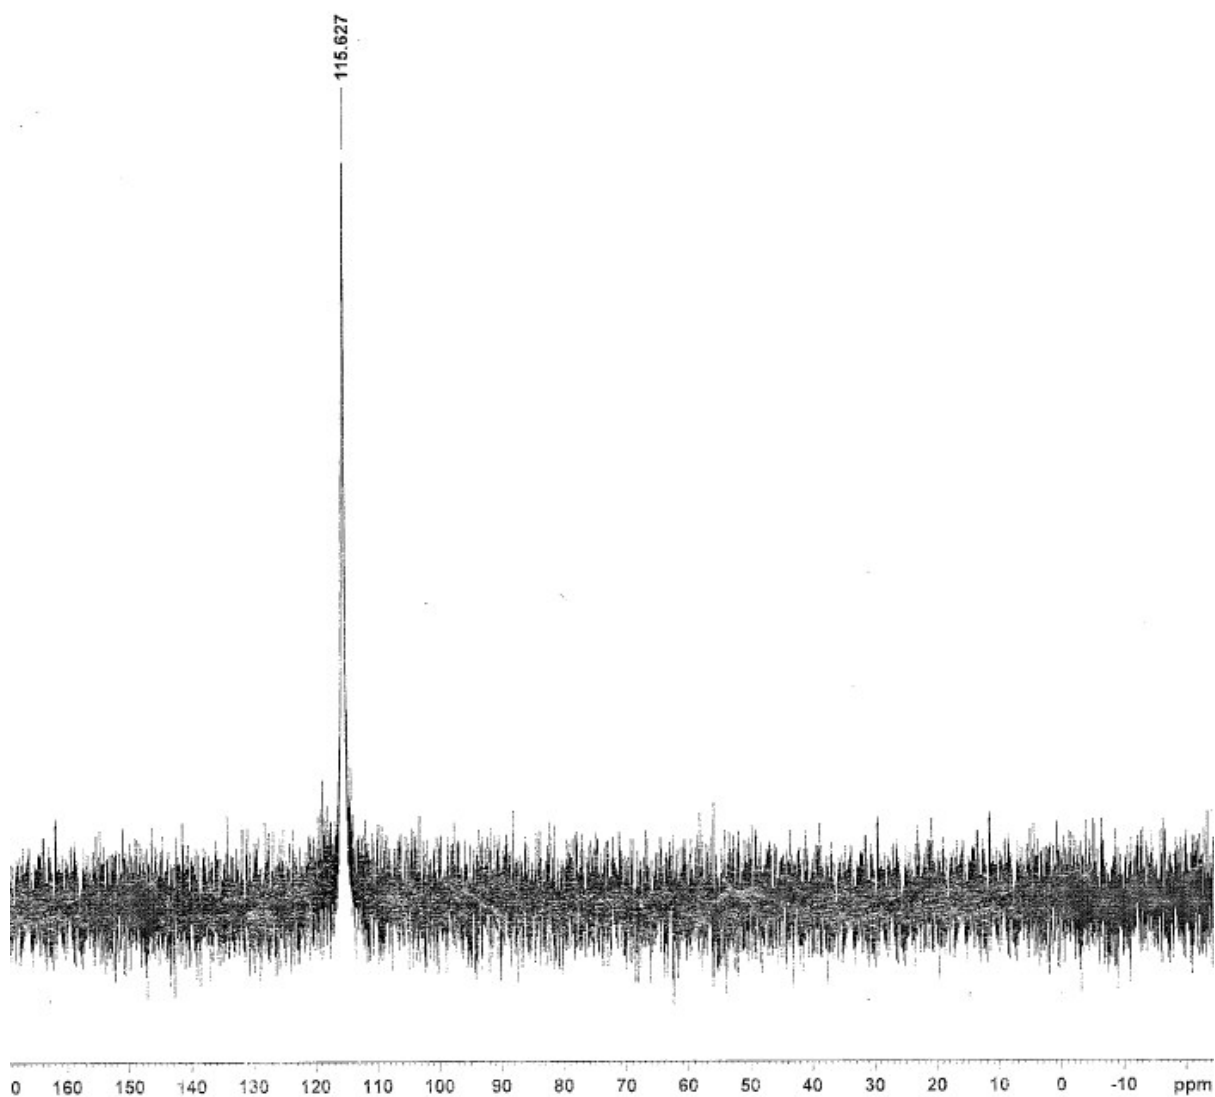

**Figure S10.**  $^{31}\text{P}$   $\{^1\text{H}\}$  NMR spectrum (160 MHz,  $\text{CDCl}_3$ , 298 K) of **4**.

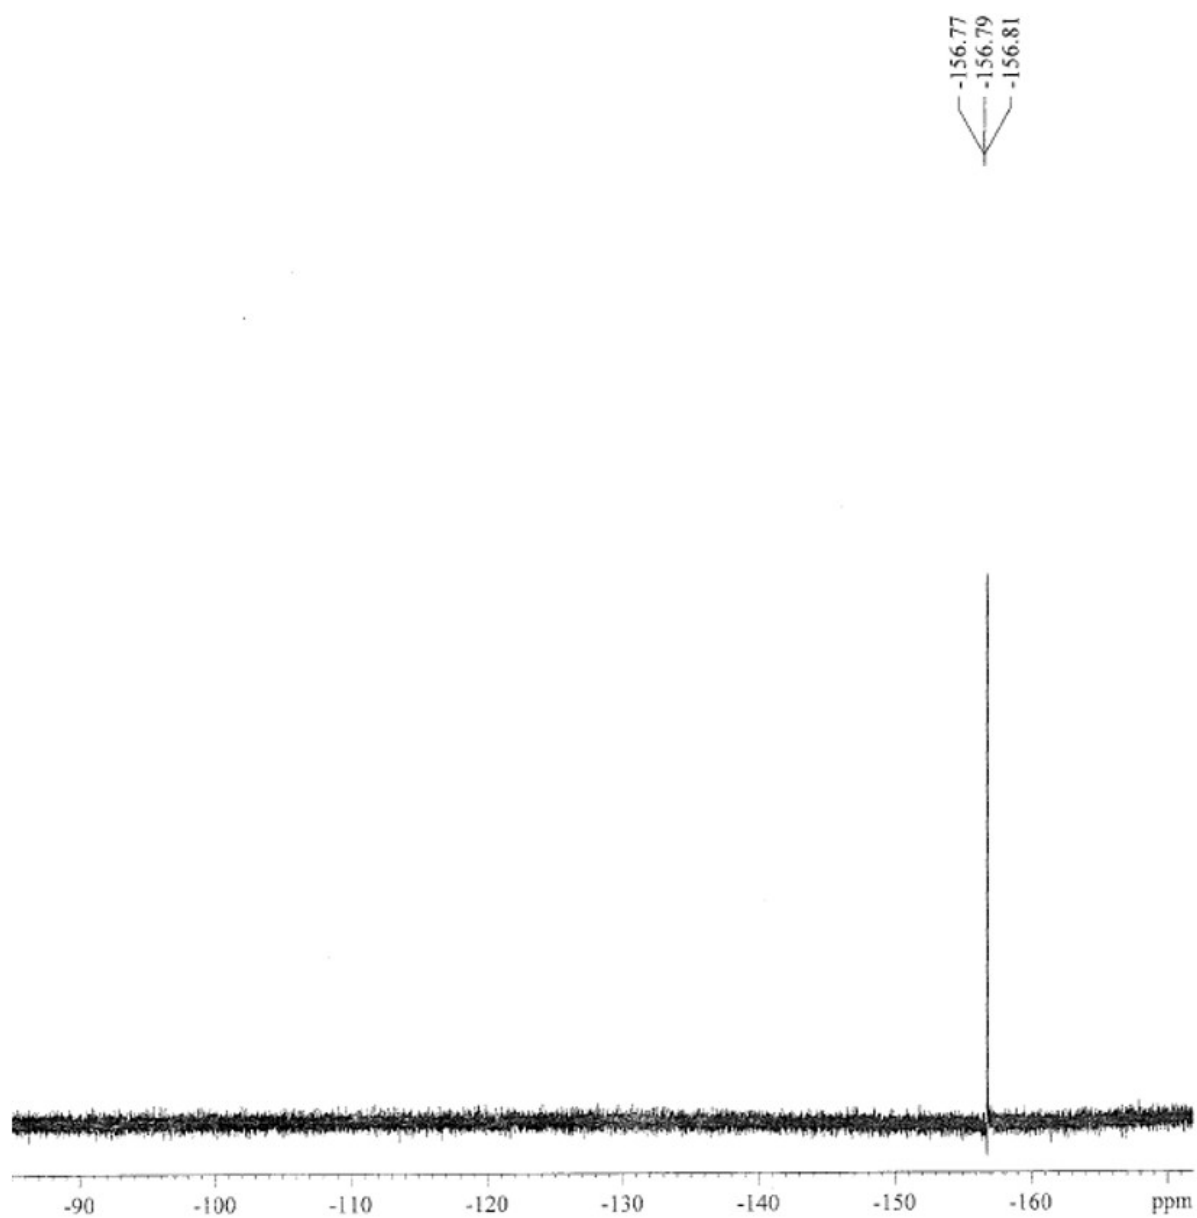

**Figure S11.**  $^{19}\text{F}$   $\{^1\text{H}\}$  NMR (376.4 MHz,  $\text{CDCl}_3$ , 25  $^\circ\text{C}$ ) spectrum of **4**.

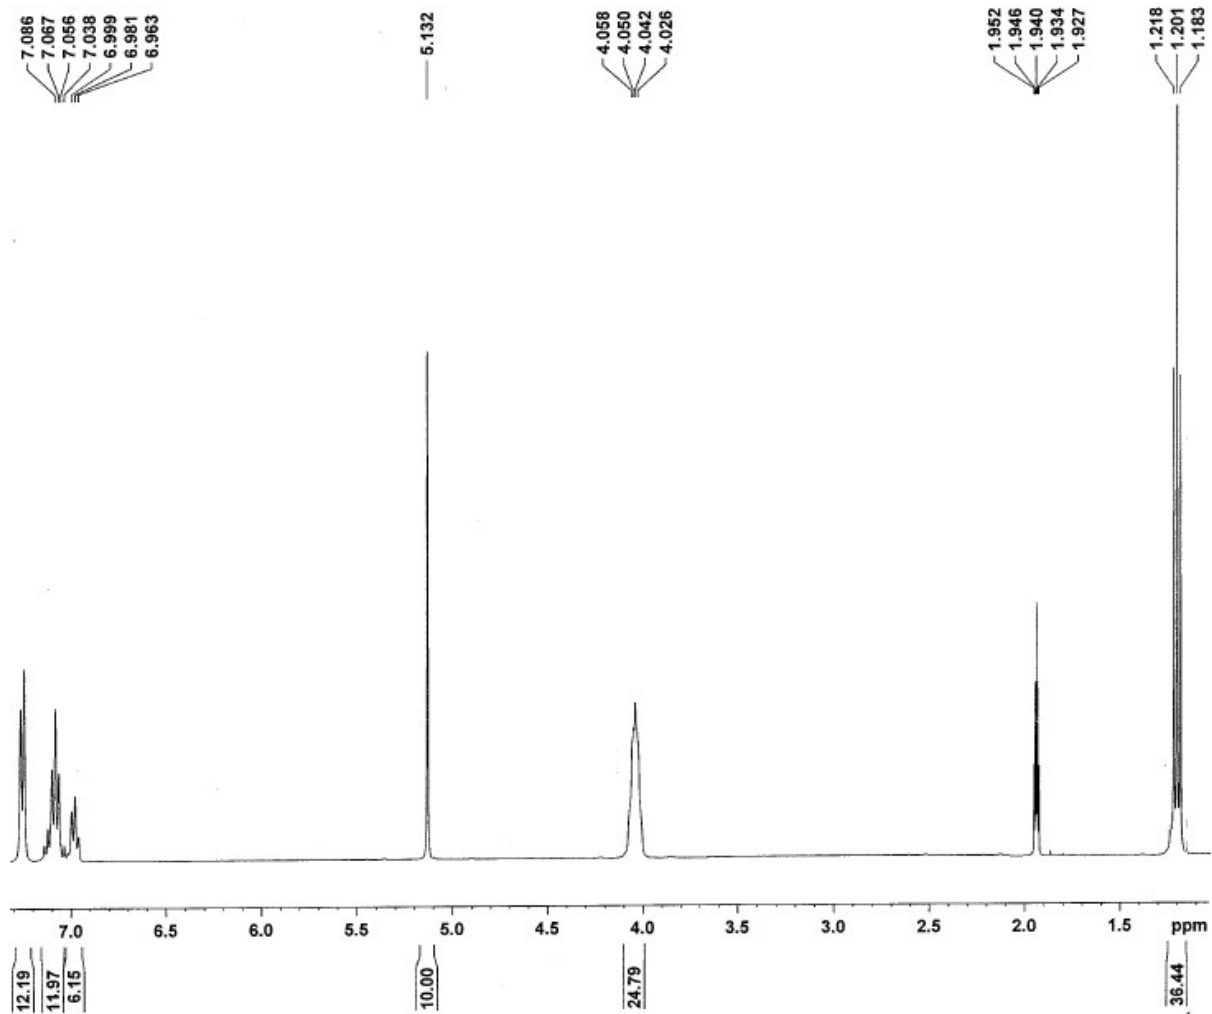

**Figure S12.**  $^1\text{H}$  NMR spectrum (400 MHz,  $\text{CD}_3\text{CN}$ , 298 K) of **6**.

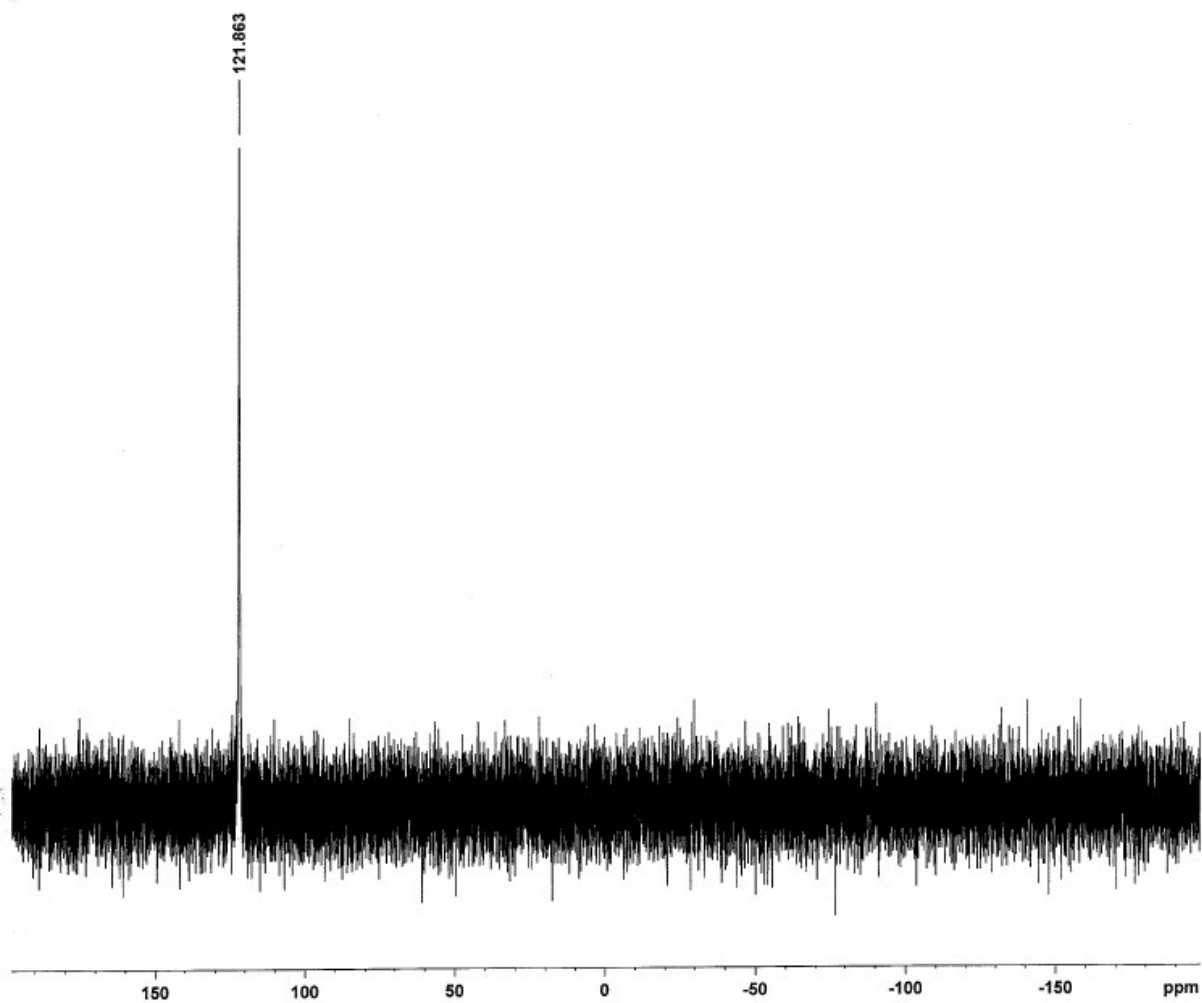

**Figure S13.**  $^{31}\text{P}$   $\{^1\text{H}\}$  NMR spectrum (160 MHz,  $\text{CD}_3\text{CN}$ , 298 K) of **6**.



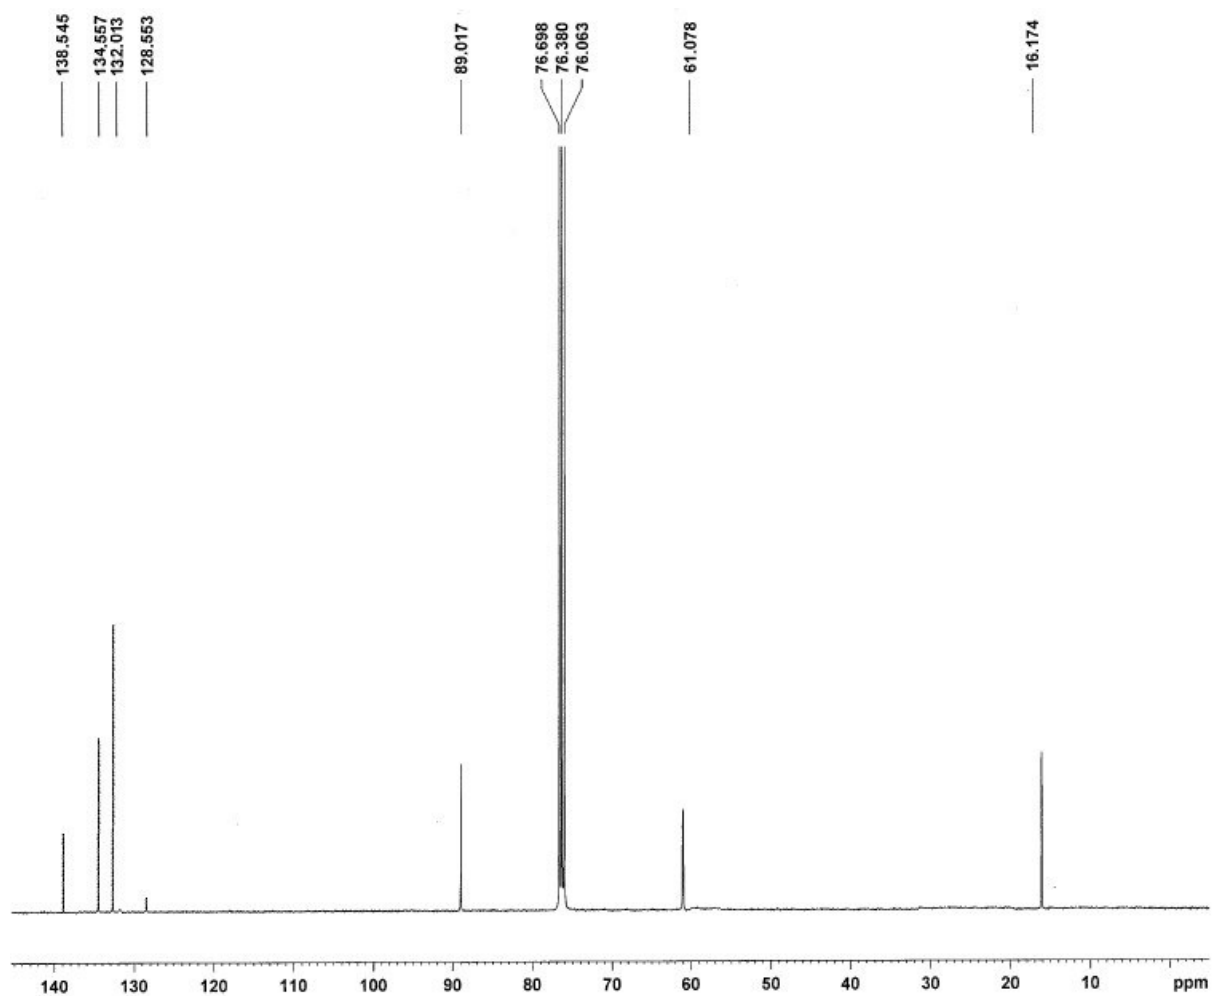

**Figure S14.**  $^{13}\text{C}\{^1\text{H}\}$  NMR spectrum (100 MHz,  $\text{CD}_3\text{CN}$ , 298 K) of **6**.

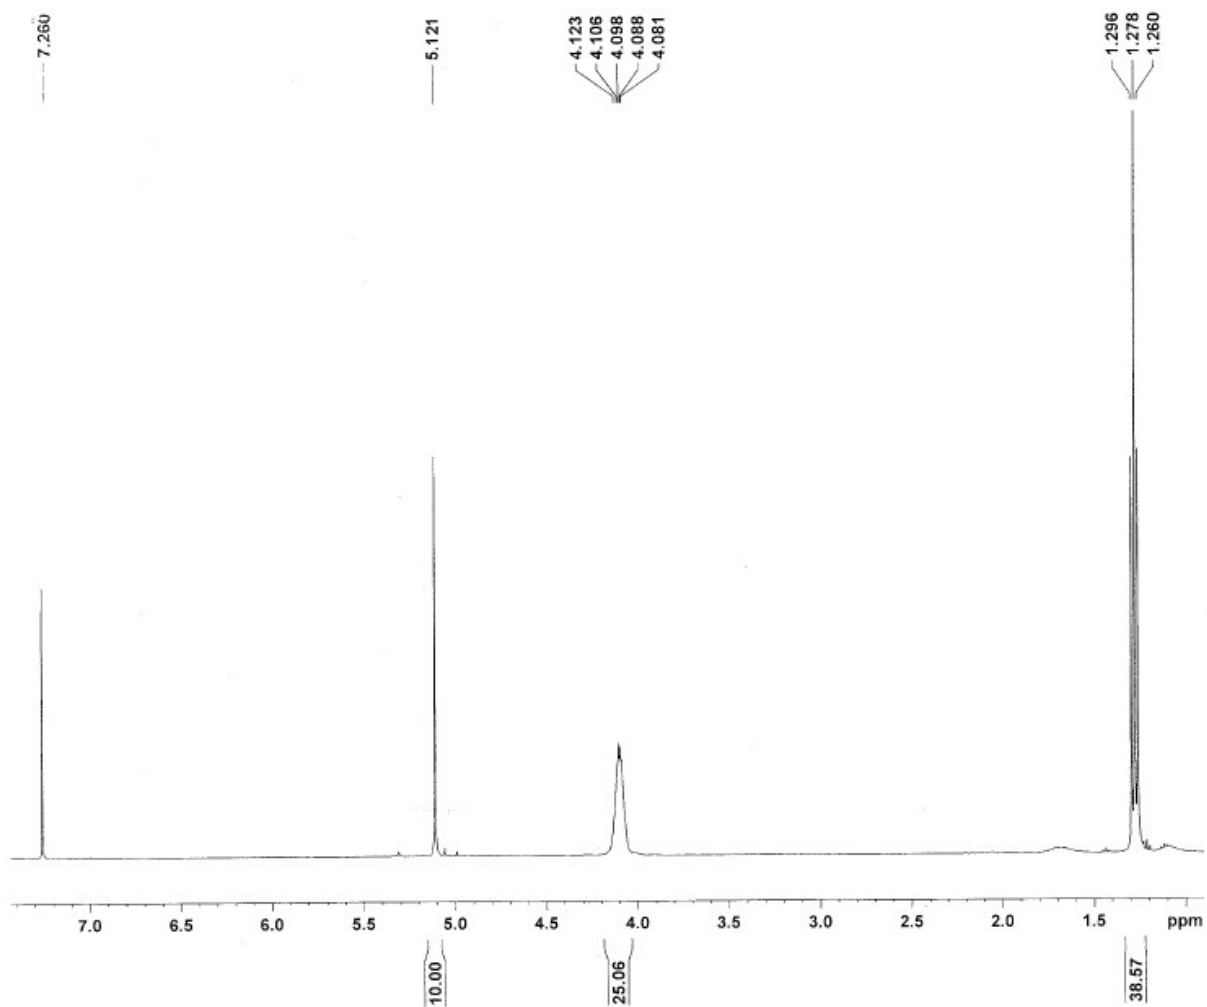

**Figure S15.**  $^1\text{H}$  NMR spectrum (400 MHz,  $\text{CDCl}_3$ , 298 K) of **7**.

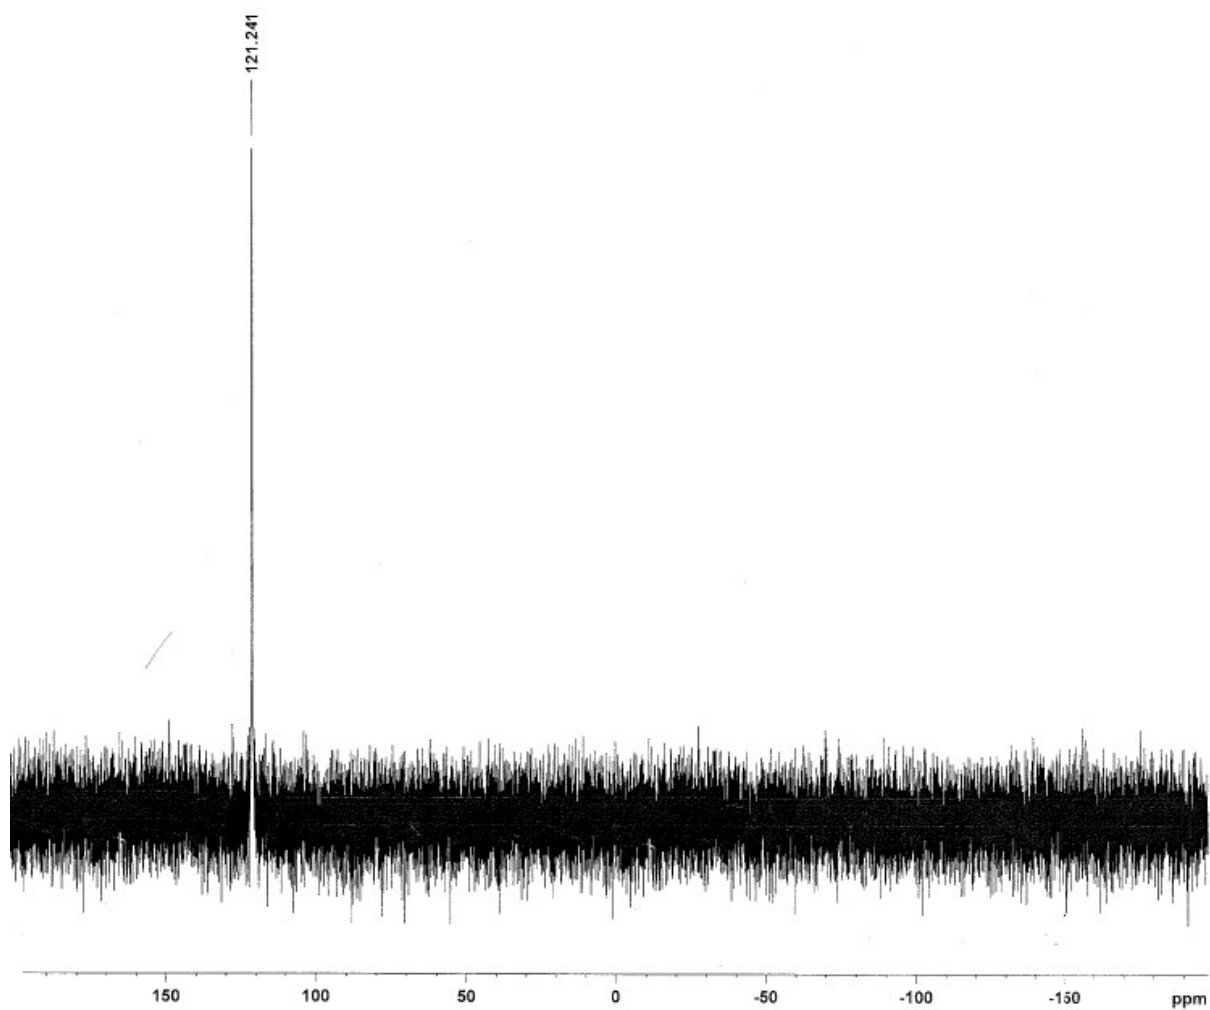

**Figure S16.**  $^{31}\text{P}$   $\{^1\text{H}\}$  NMR spectrum (160 MHz,  $\text{CDCl}_3$ , 298K) of **7**.

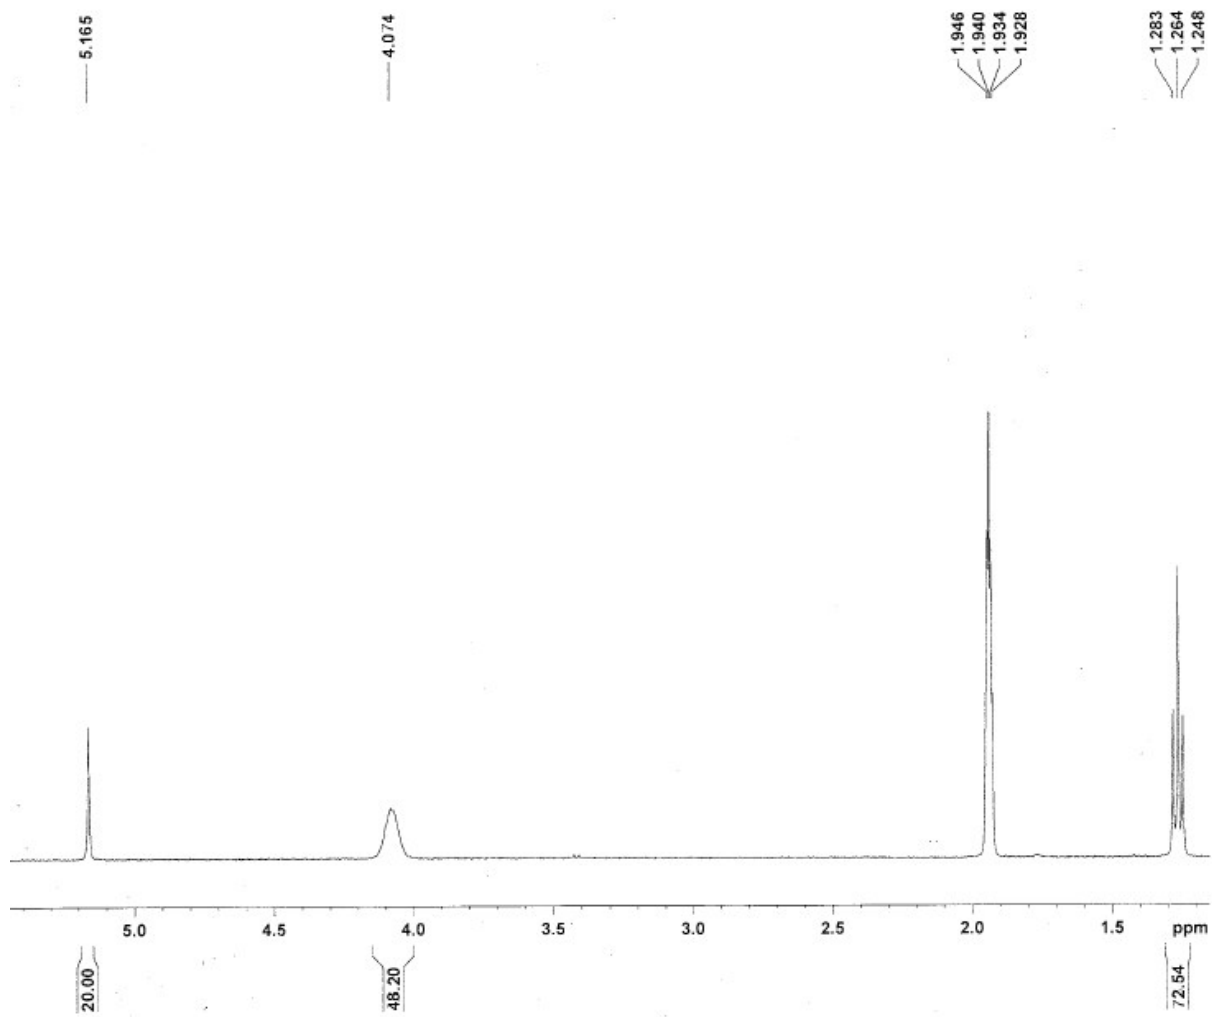

**Figure S17.**  $^1\text{H}$  NMR spectrum (400 MHz,  $\text{CD}_3\text{CN}$ , 298 K) of **8**.

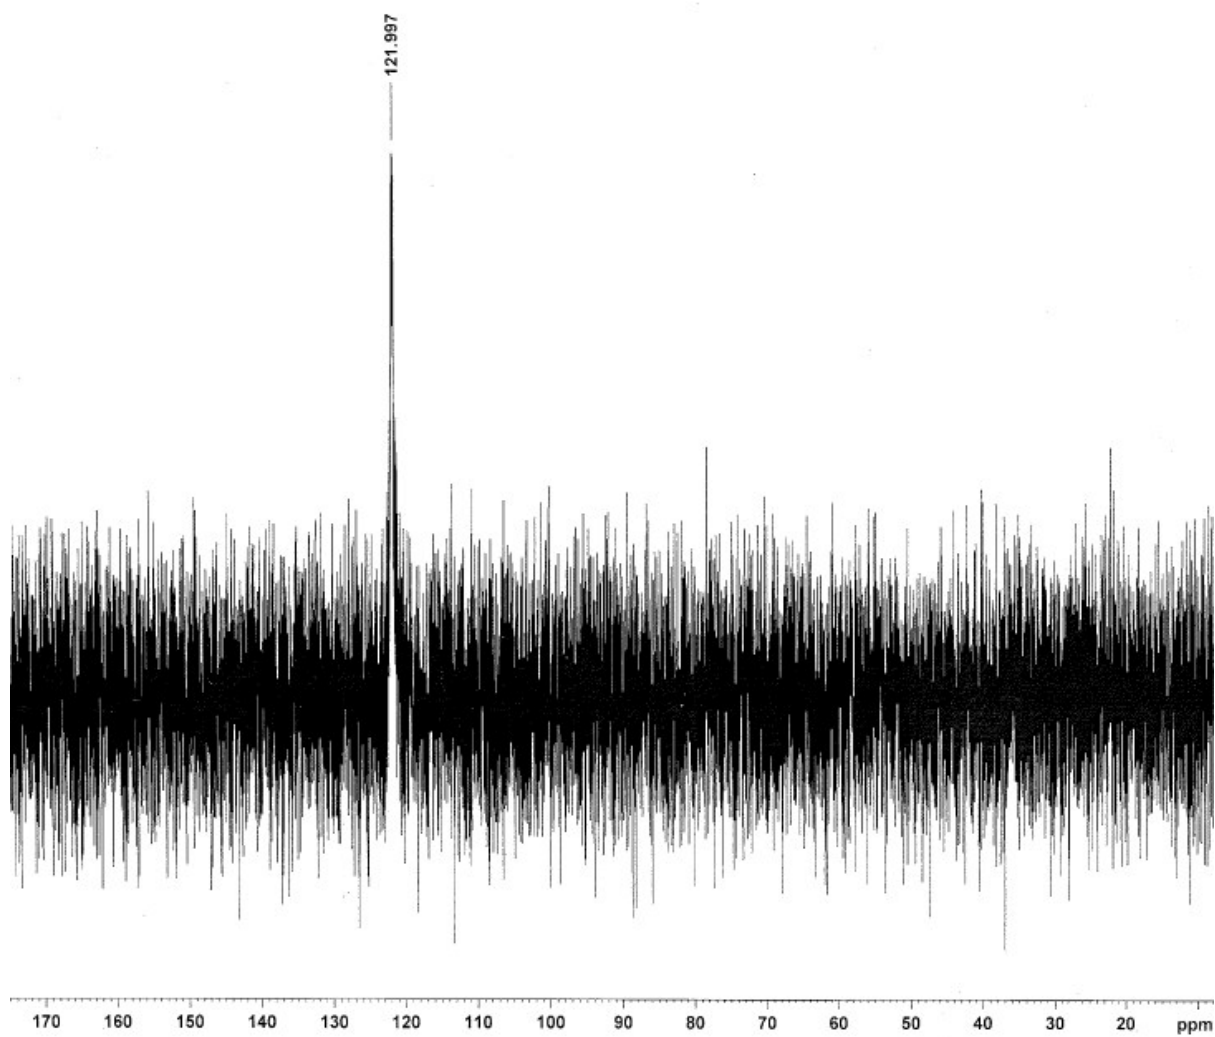

**Figure S18.**  $^{31}\text{P}$   $\{^1\text{H}\}$  NMR spectrum (160 MHz,  $\text{CD}_3\text{CN}$ , 298K) of **8**.

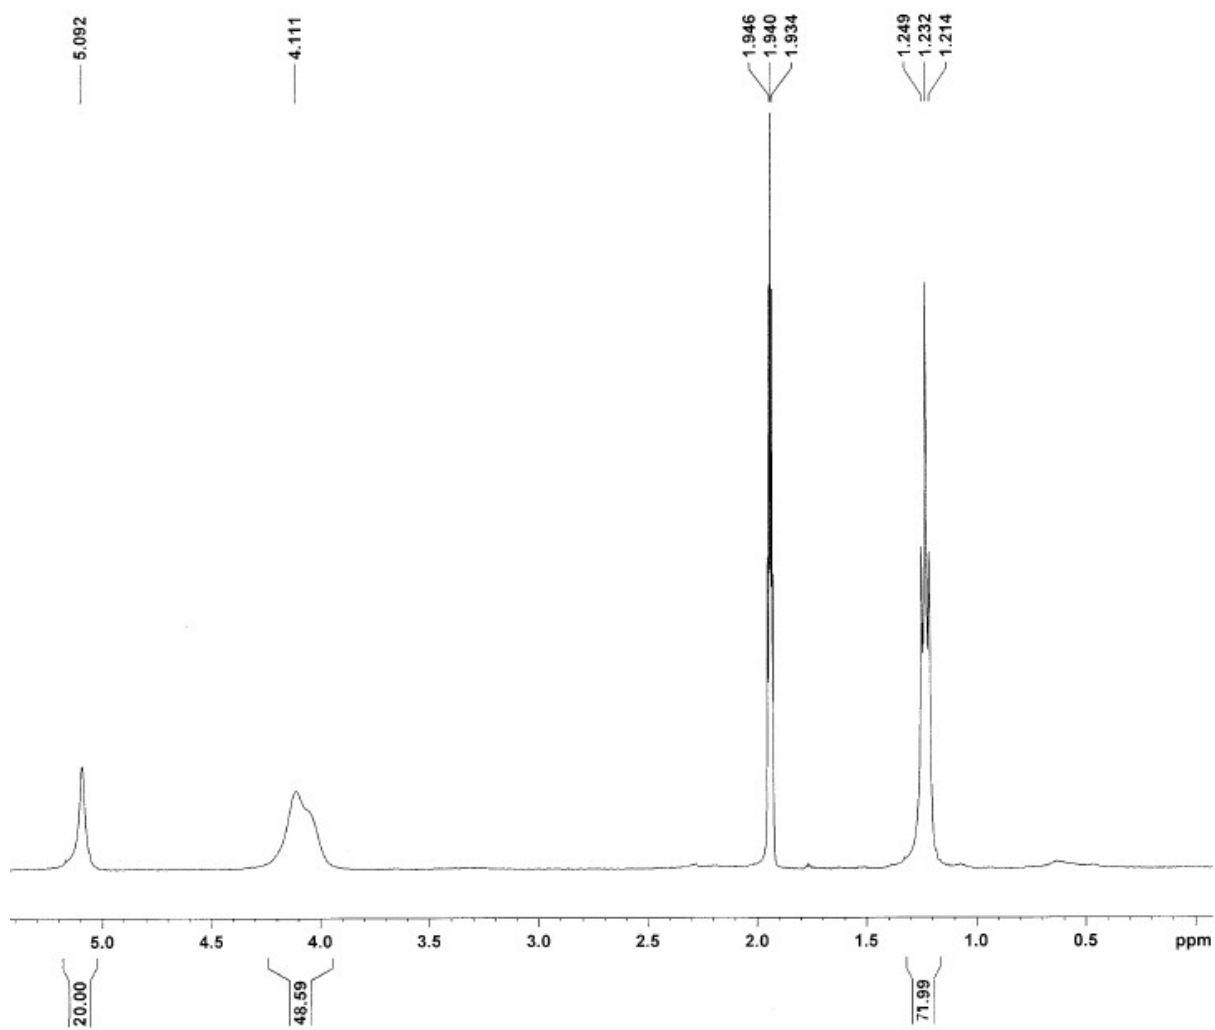

**Figure S19.** <sup>1</sup>H NMR spectrum (400 MHz, CD<sub>3</sub>CN, 298 K) of **9**.

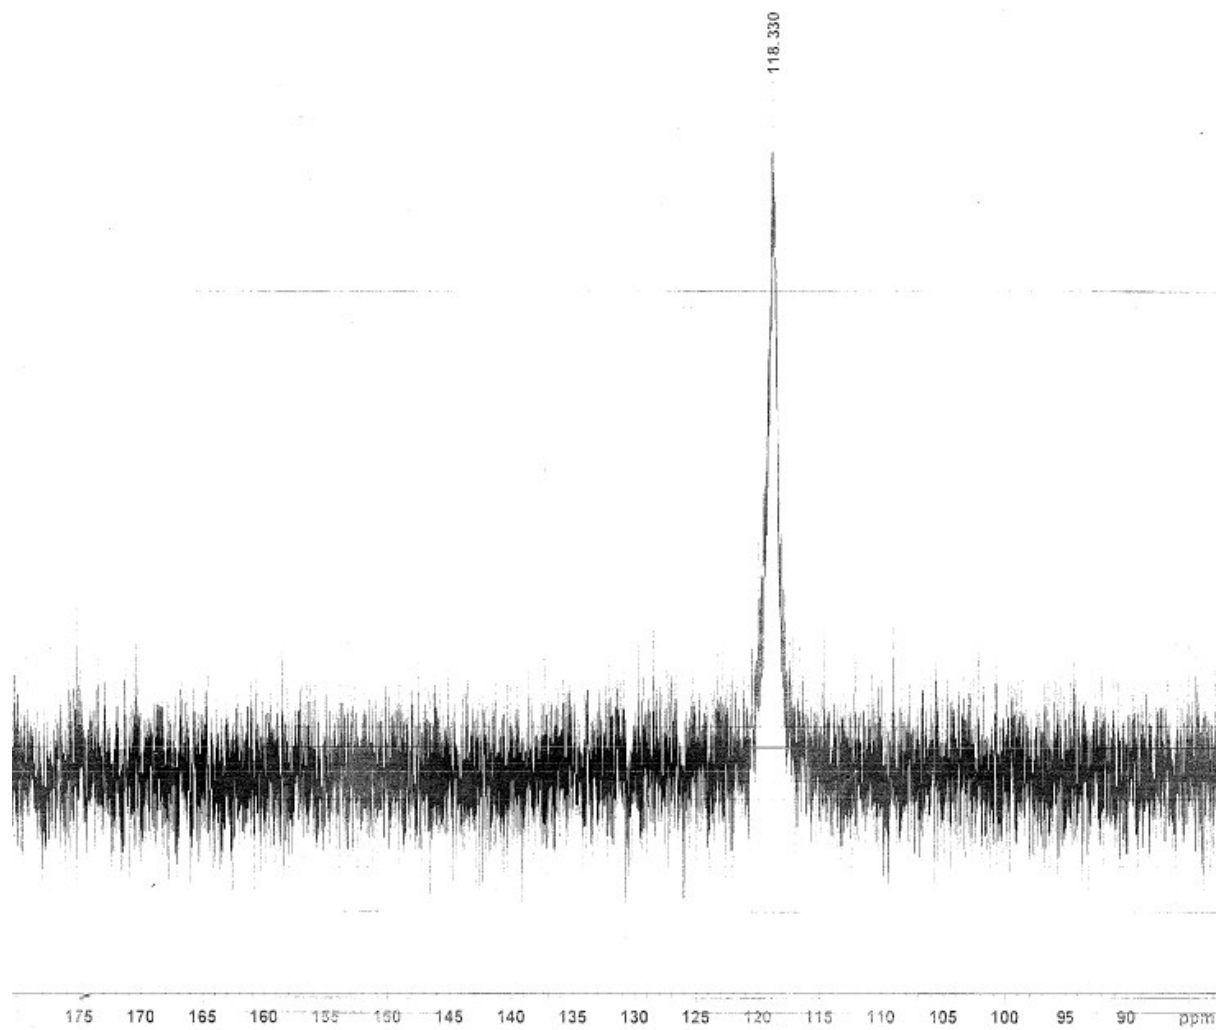

**Figure S20.**  $^{31}\text{P}$   $\{^1\text{H}\}$  NMR spectrum (160 MHz,  $\text{CD}_3\text{CN}$ , 298 K) of **9**

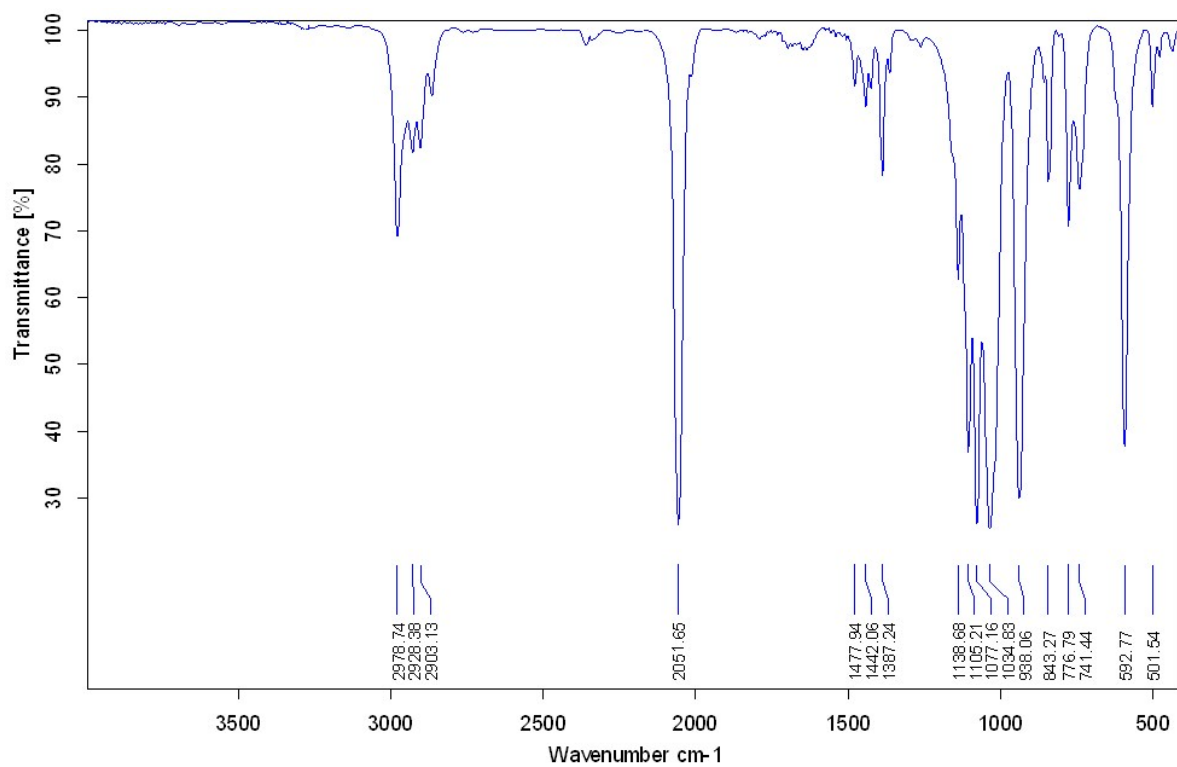

**Figure S21.** IR (KBr) spectrum of **2**.



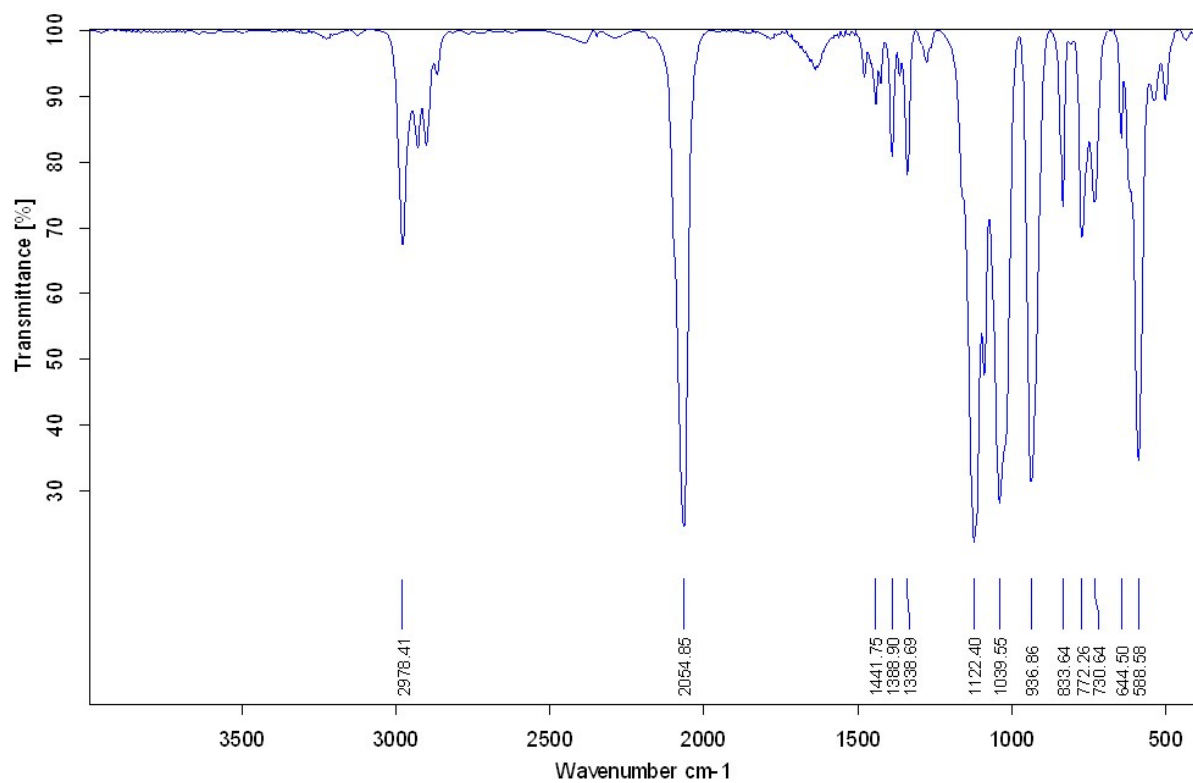

**Figure S22.** IR (KBr) spectrum of **3**.

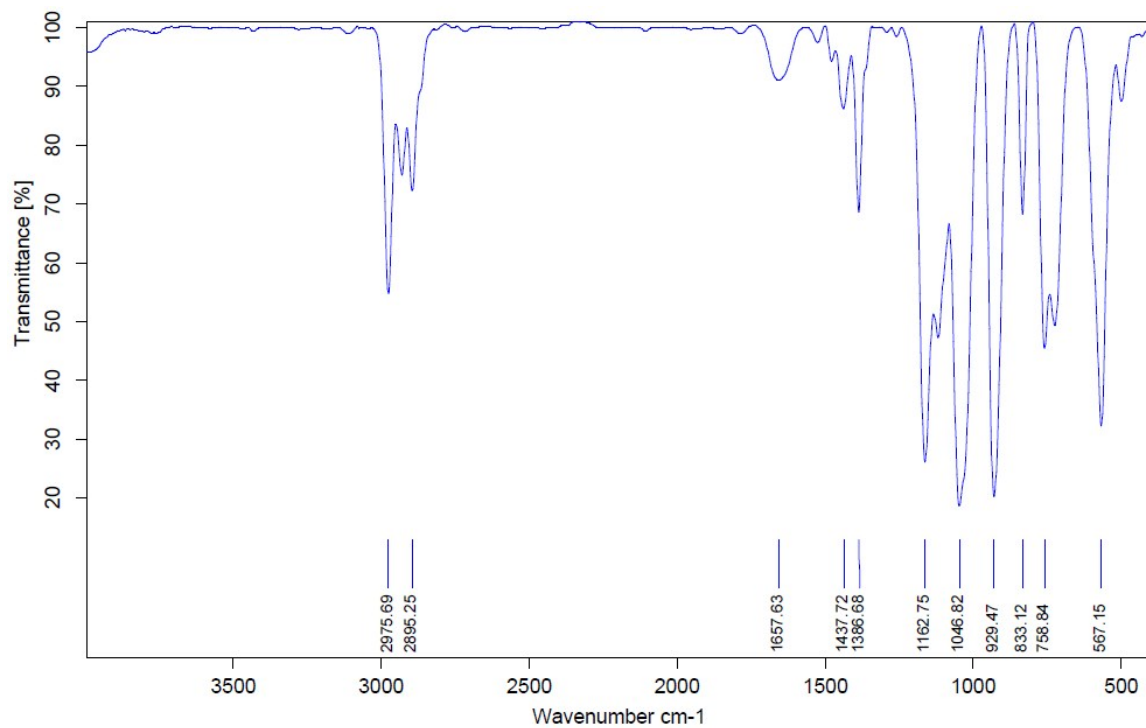

**Figure S23.** IR (KBr) spectrum of **4**.

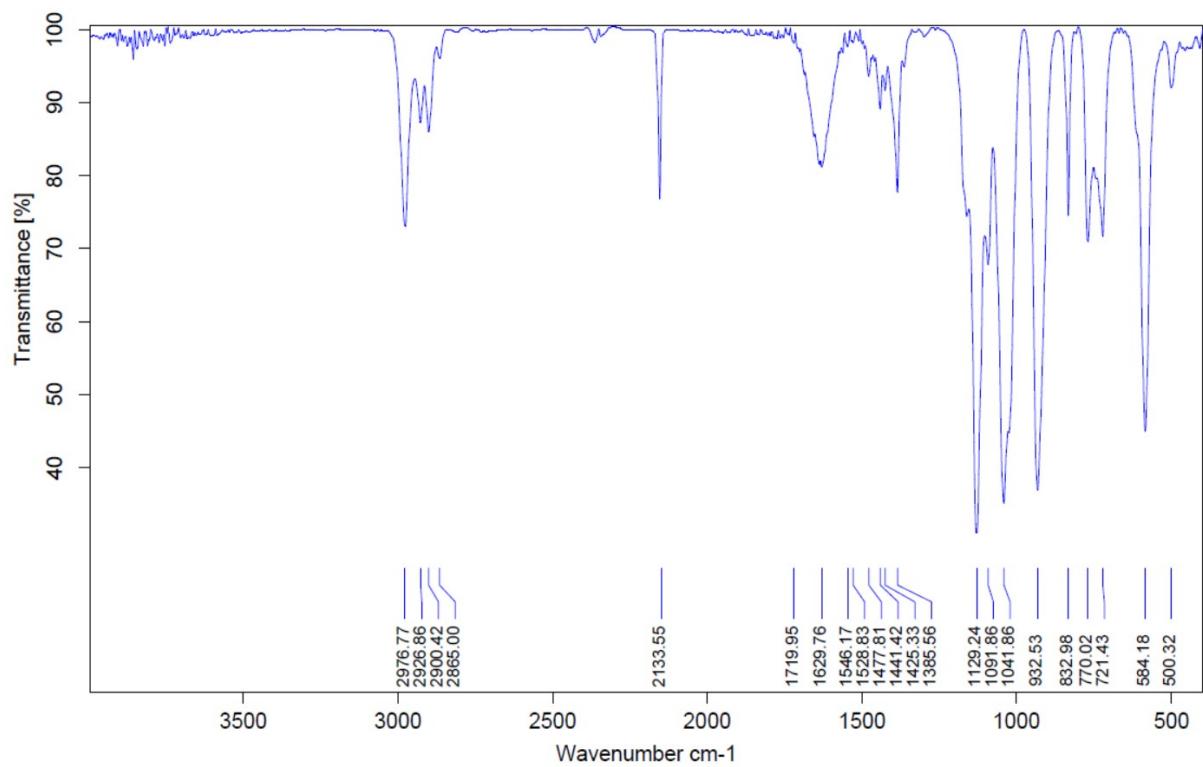

**Figure S24.** IR (KBr) spectrum of **5**.

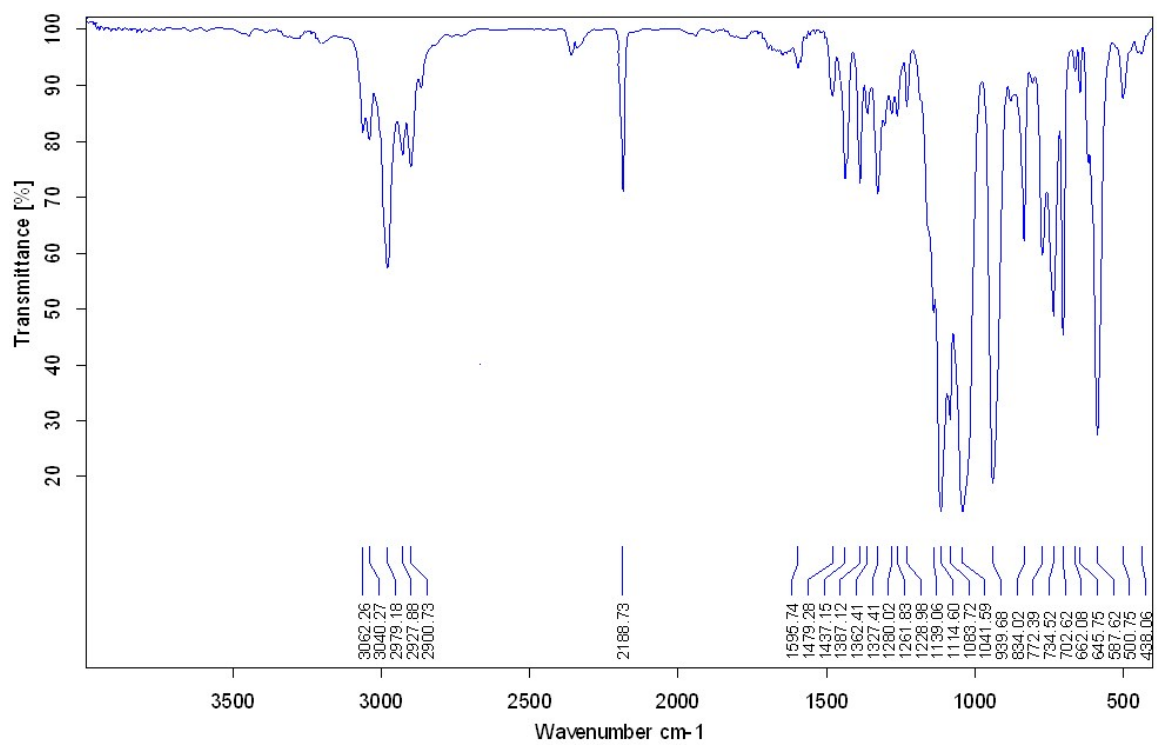

Figure S25. IR (KBr) spectrum of 6.

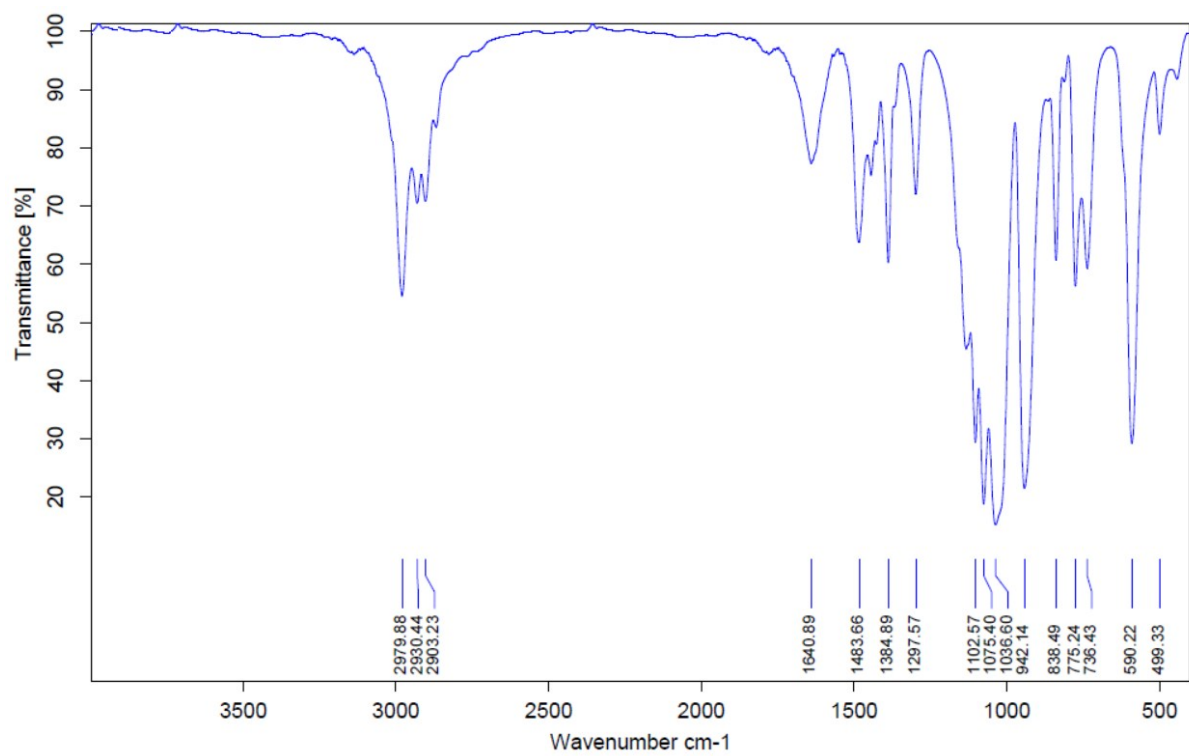

**Figure S26.** IR (KBr) spectrum of **7**.

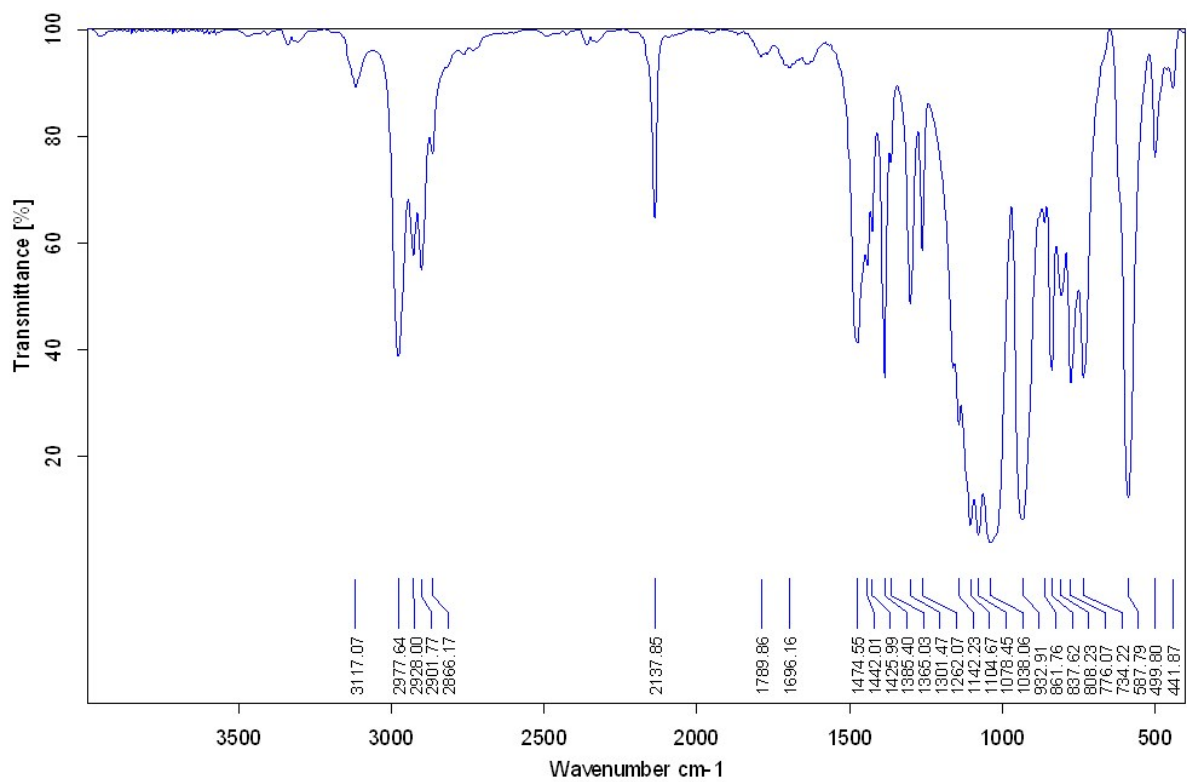

Figure S27. IR (KBr) spectrum of **8**.

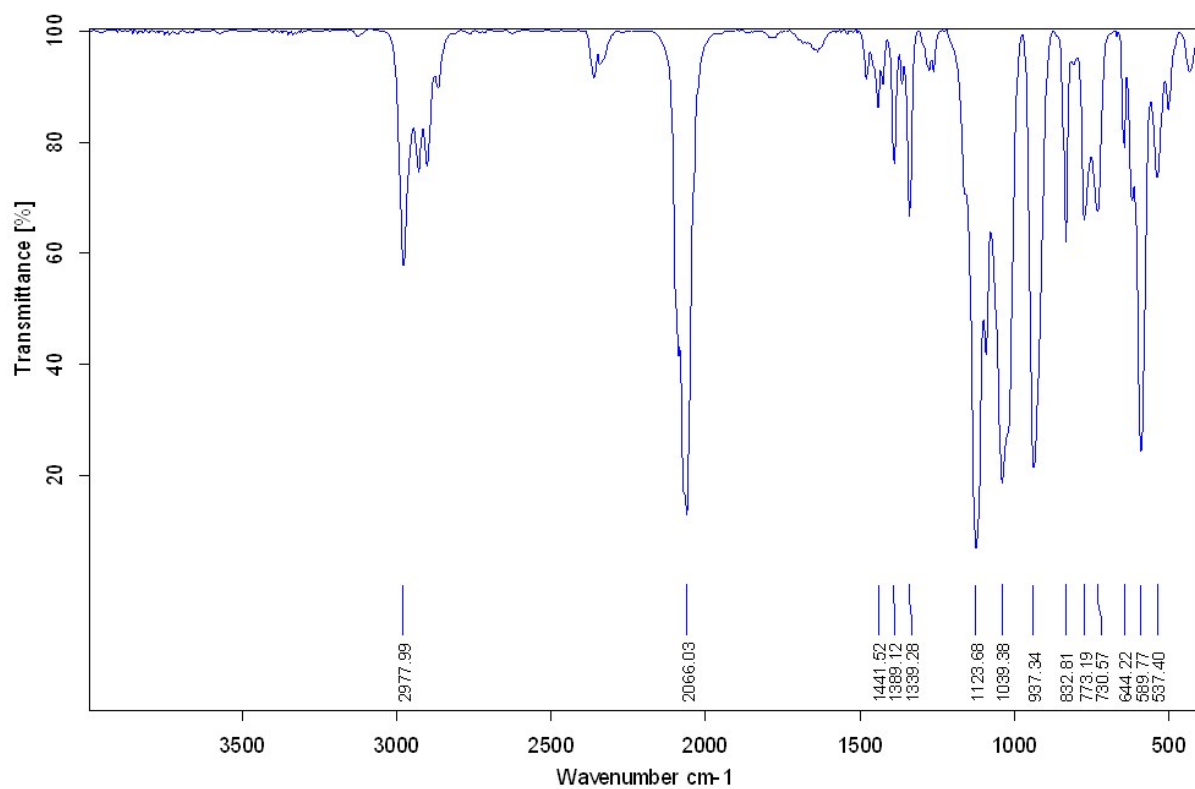

**Figure S28.** IR (KBr) spectrum of **9**.

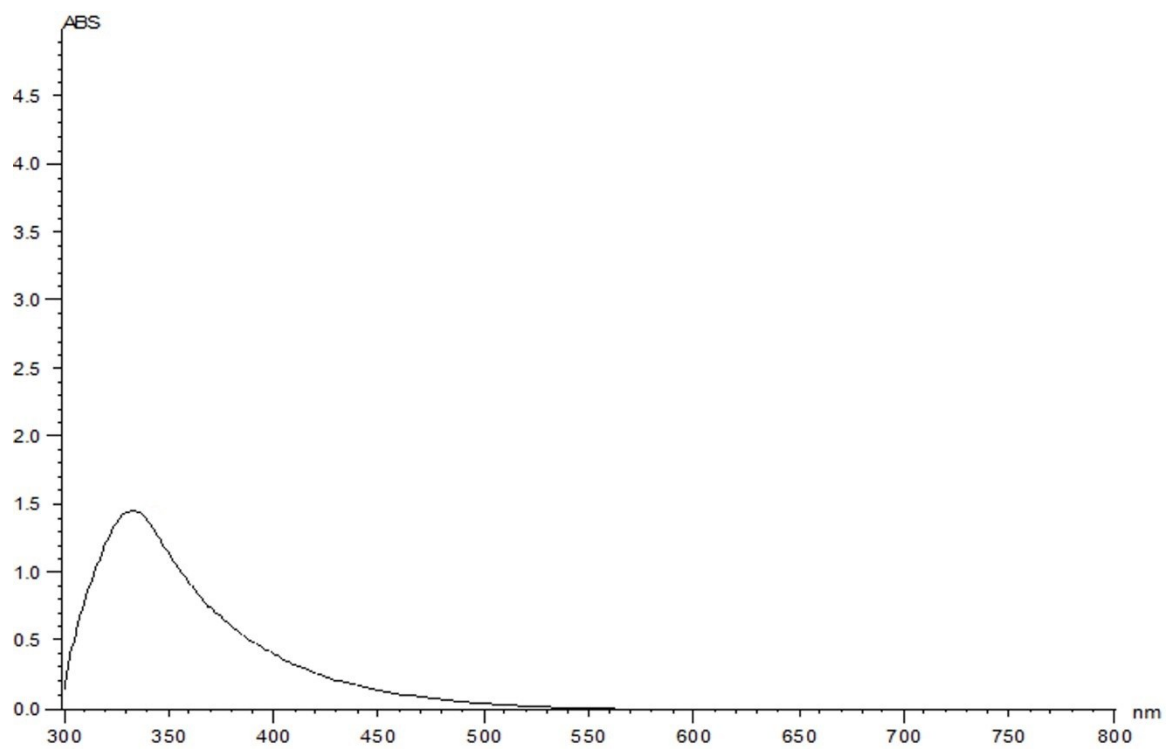

**Figure S29.** UV/Vis spectrum of **1** in MeCN.



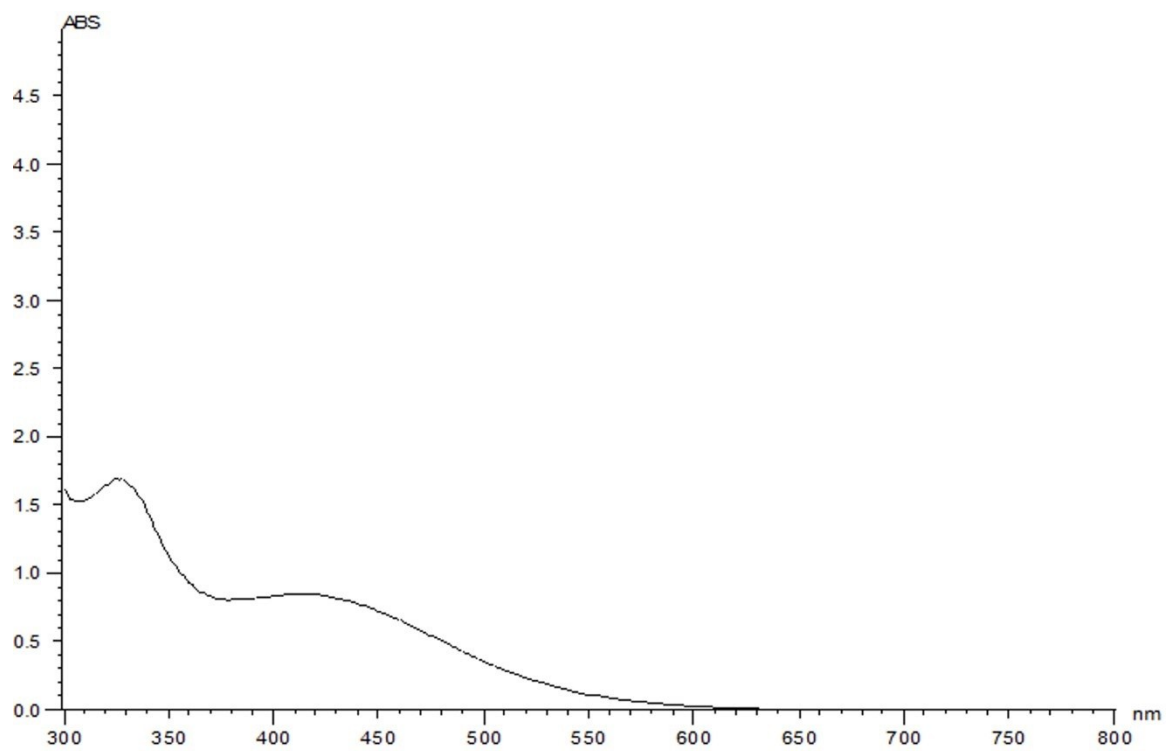

**Figure S30.** UV/Vis spectrum of **2** in MeCN.

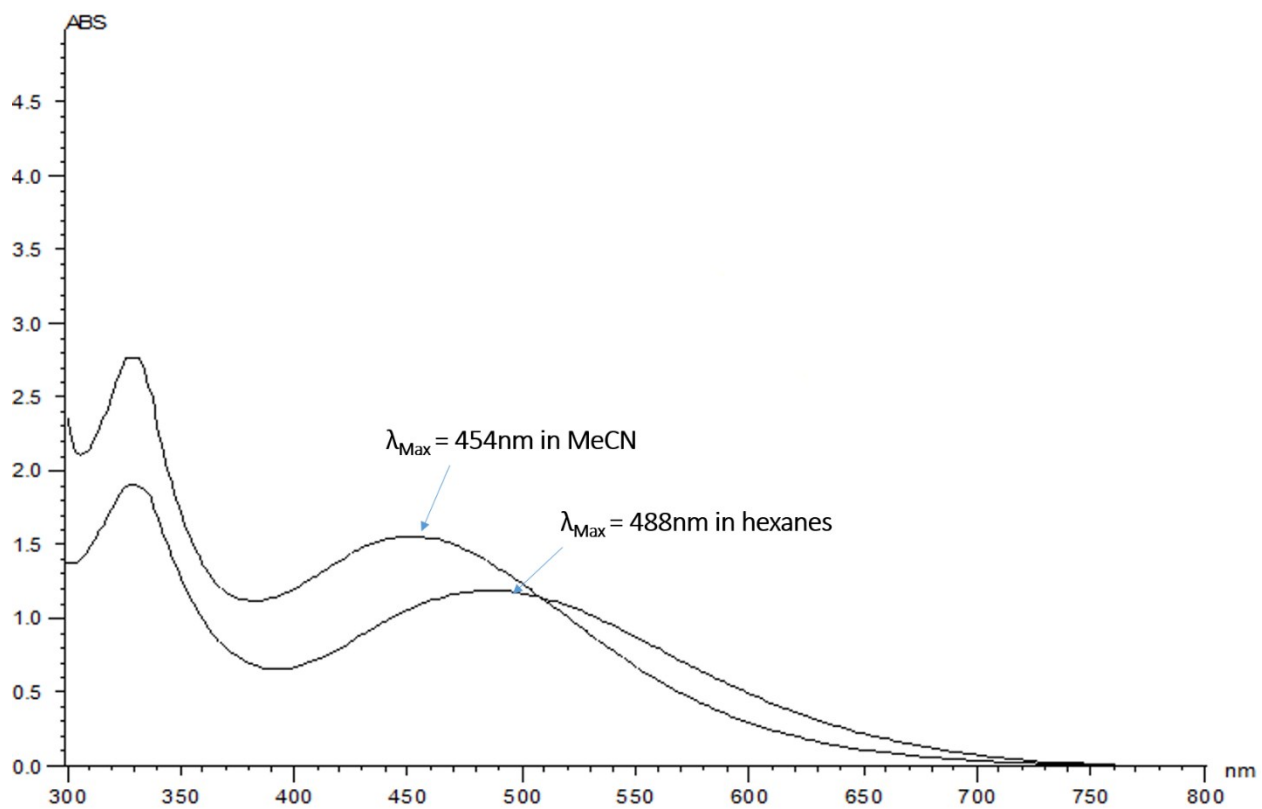

**Figure S31.** UV/Vis spectra of **3** in MeCN and hexanes

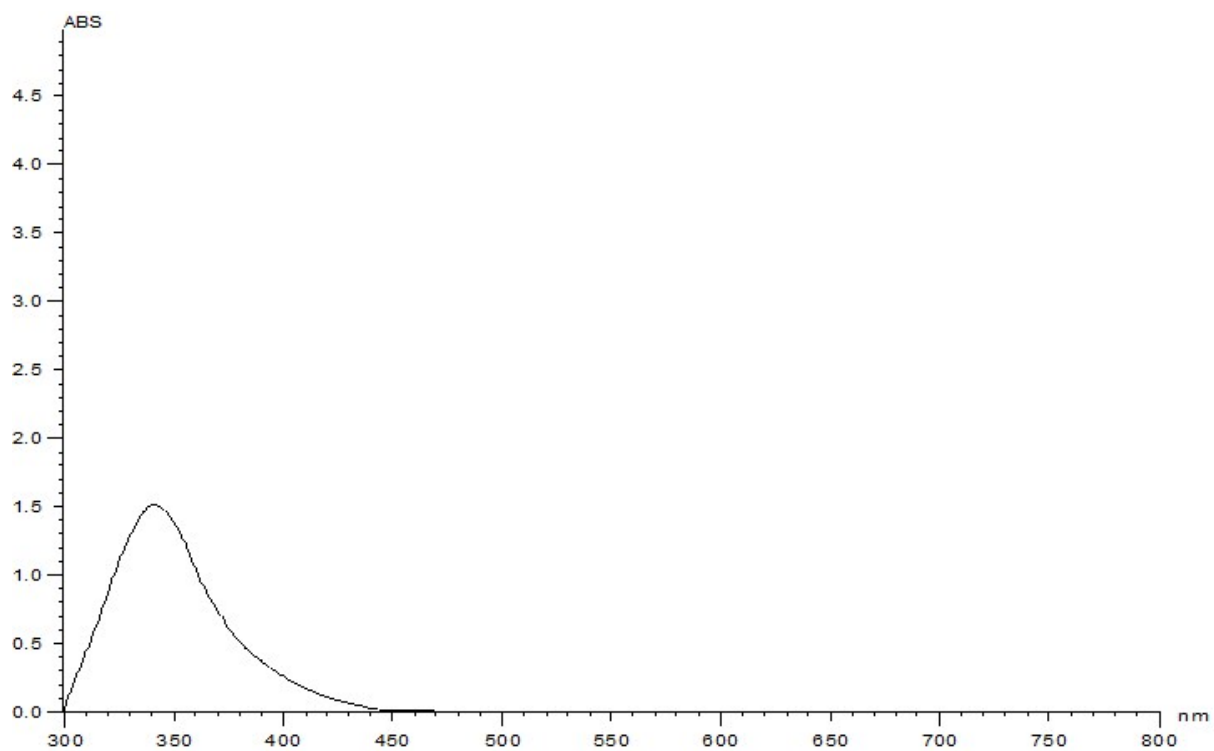

**Figure S32.** UV/Vis spectrum of **4** in MeCN.

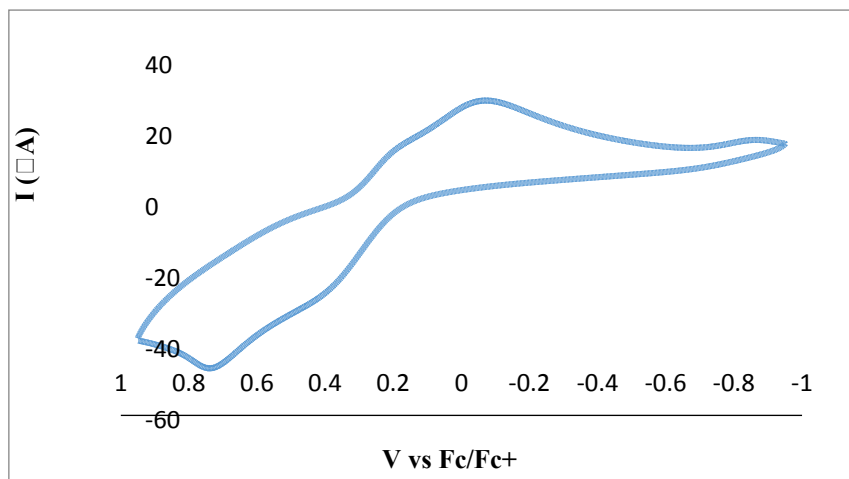

**Figure S33.** Cyclic voltammogram of  $[\text{Ce}(\text{L}_{\text{OEt}})_2(\text{NCS})_2]$  (**2**) in MeCN with 0.1 M  $[\text{nBu}_4\text{N}]\text{PF}_6$  (working electrode: glassy carbon electrode; scan rate =  $100 \text{ mV s}^{-1}$ ).

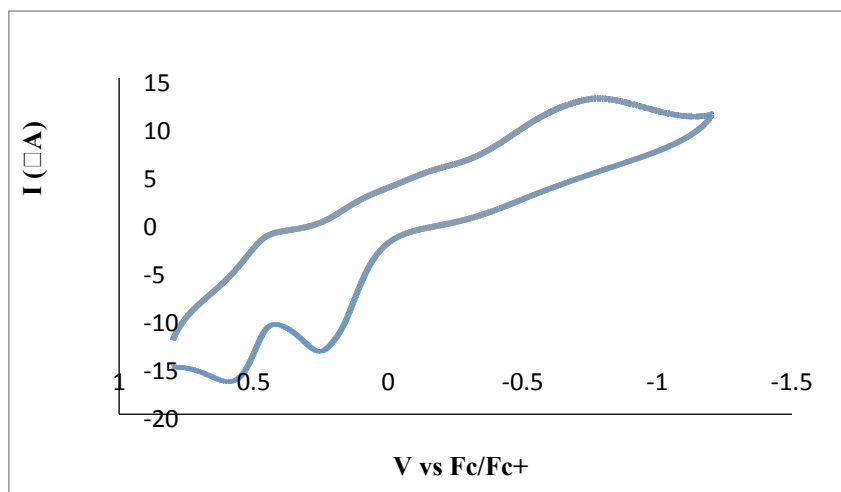

**Figure S34.** Cyclic voltammogram of  $[\text{Ce}(\text{L}_{\text{OEt}})_2(\text{N}_3)_2]$  (**3**) in MeCN with 0.1 M  $[\text{nBu}_4\text{N}]\text{PF}_6$  (working electrode: glassy carbon electrode; scan rate =  $100 \text{ mVs}^{-1}$ ).
